# Supplementary material for: Bioactive Polycyclic Quinones from Marine Streptomyces sp. 182SMLY
Source: PubMed Central journal article supplement (PMC4728507; doi:10.3390/md14010010), 2016-01-06
Supplement: marinedrugs-14-00010-s001.pdf [file marinedrugs-14-00010-s001.pdf]

# Supplementary Materials: Bioactive Polycyclic Quinones from Marine *Streptomyces* sp. 182SMLY

Ying Liang, Xin Xie, Lu Chen, Shilun Yan, Xuwei Ye, Komal Anjum, Haocai Huang, Xiao-Yuan Lian and Zhizhen Zhang

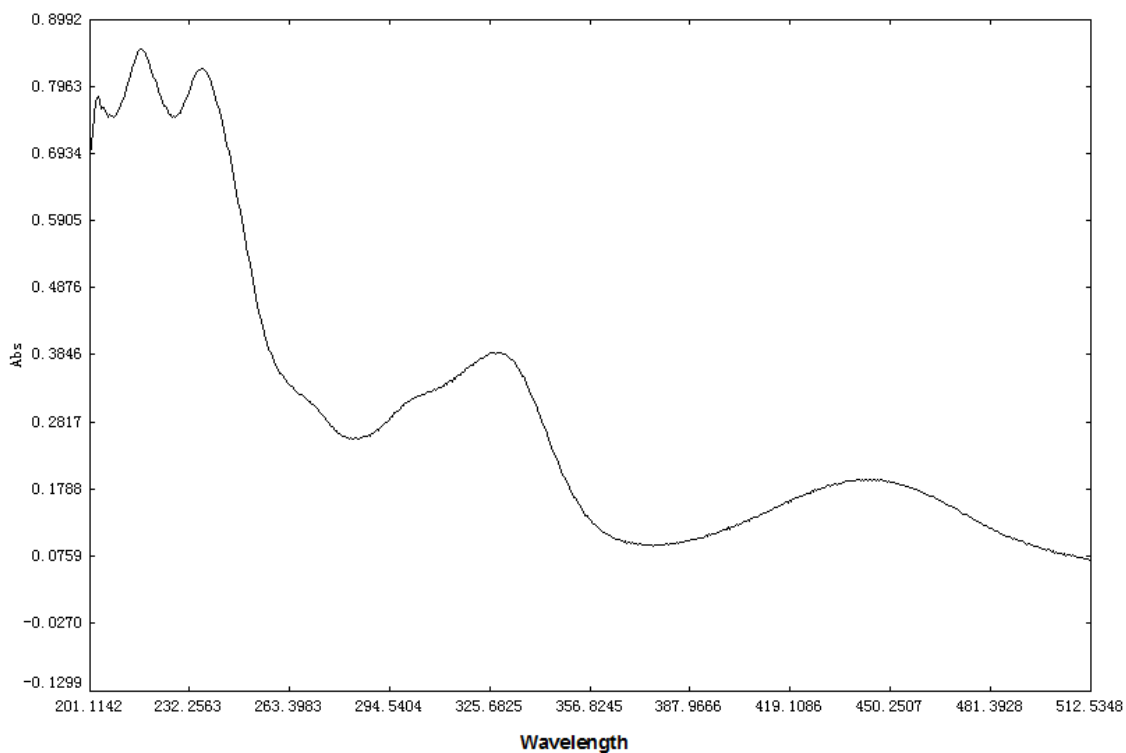

Figure S1. UV Spectrum of *N*-acetyl-*N*-demethylmayamycin (**1**).

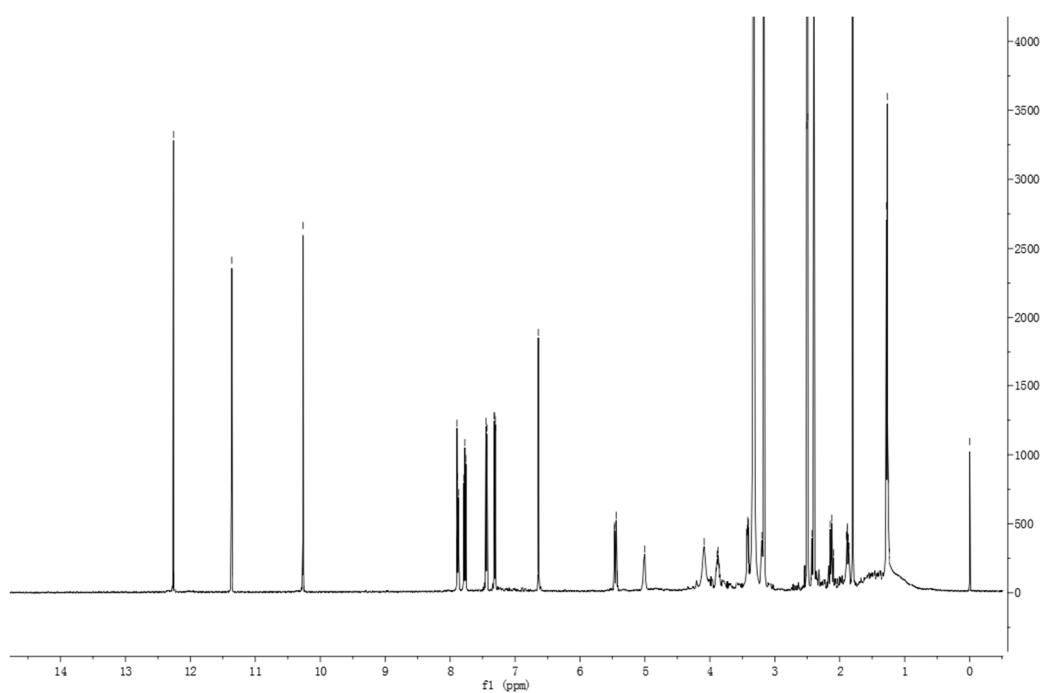

Figure S2. <sup>1</sup>H NMR Spectrum of *N*-acetyl-*N*-demethylmayamycin (**1**).

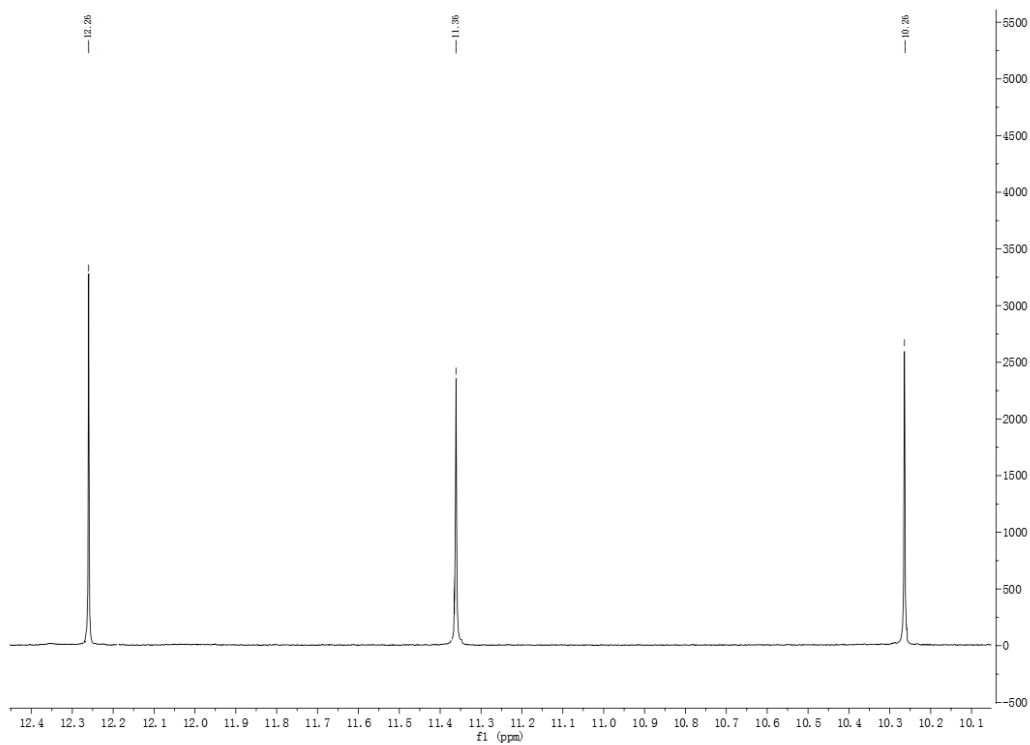

Figure S3. 1H NMR Spectrum of *N*-acetyl-*N*-demethylmayamycin (1).

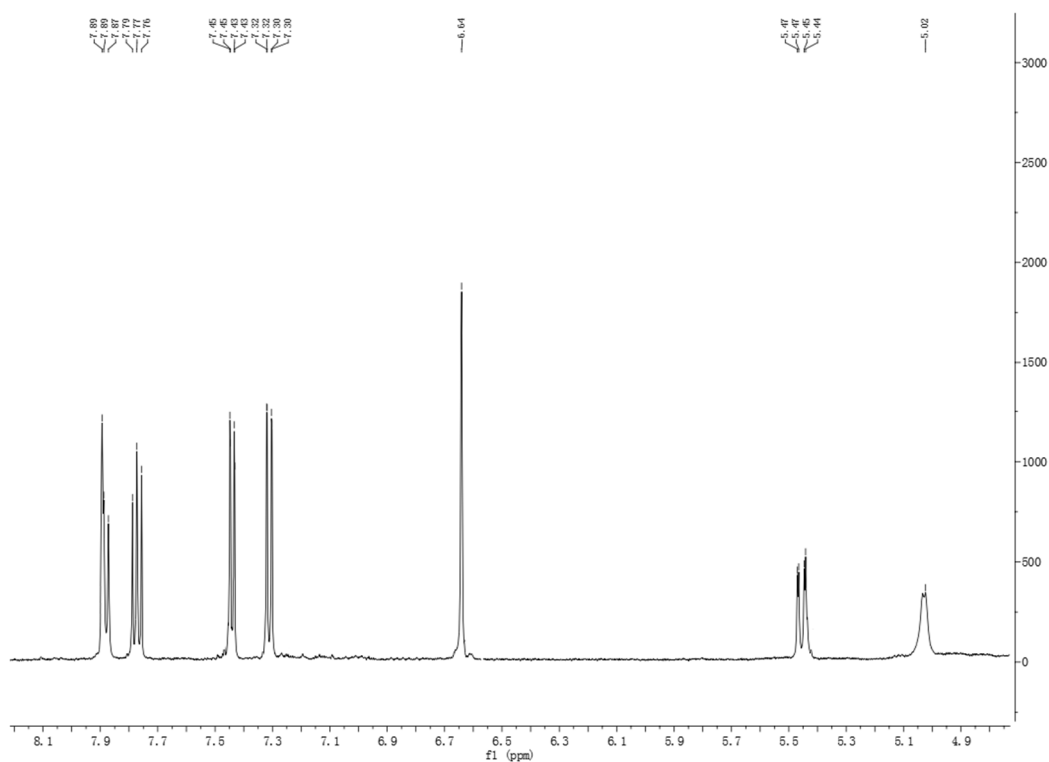

Figure S4. 1H NMR Spectrum of *N*-acetyl-*N*-demethylmayamycin (1).

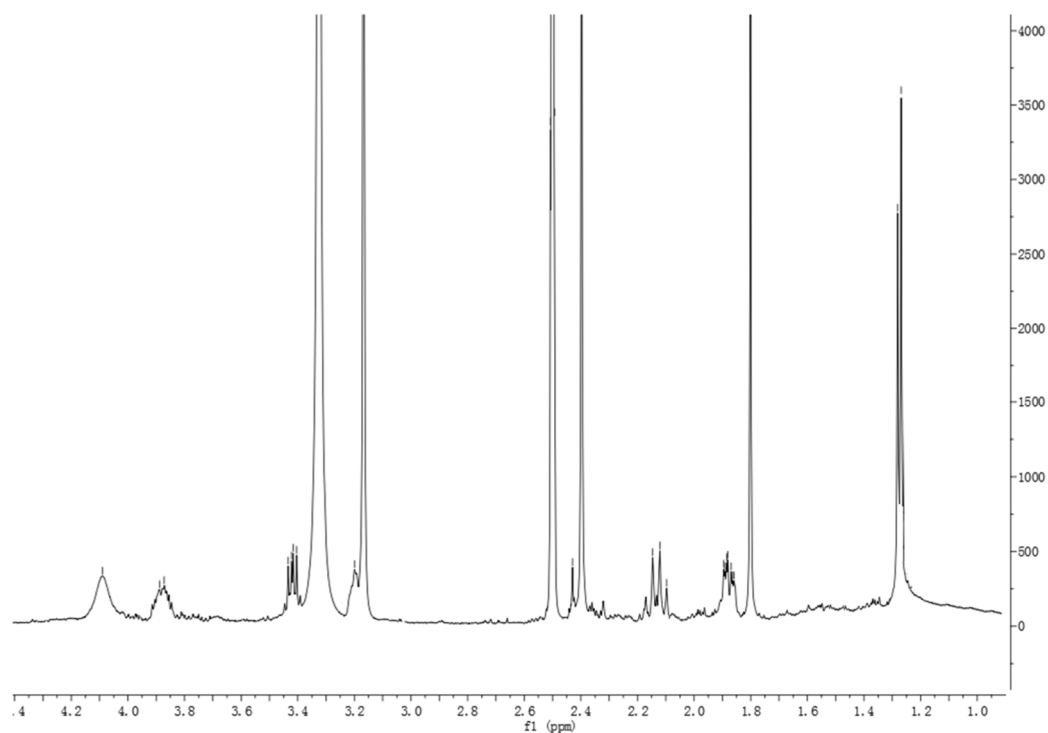

Figure S5. <sup>1</sup>H NMR Spectrum of *N*-acetyl-*N*-demethylmayamycin (**1**).

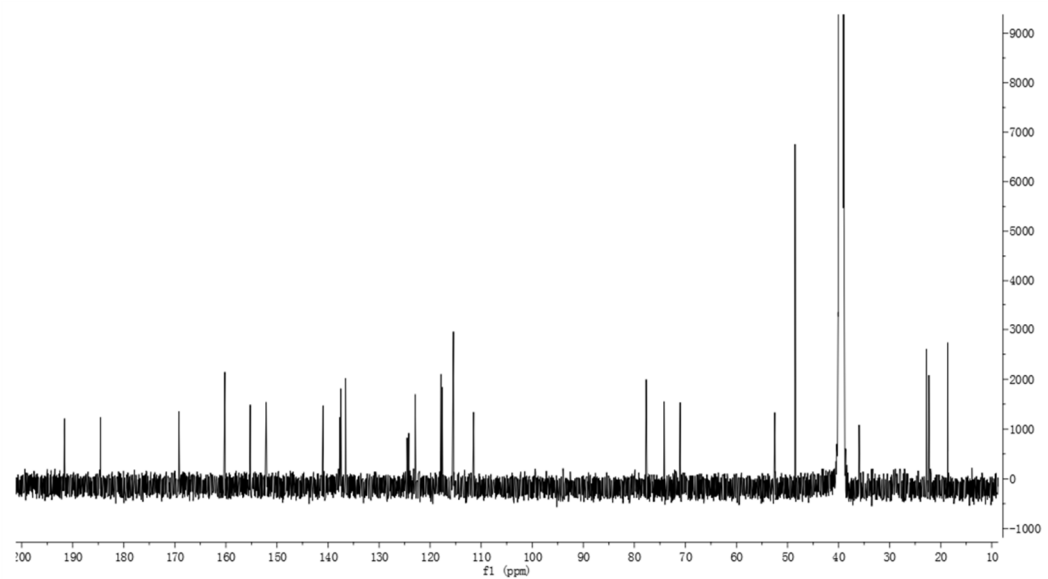

Figure S6. <sup>13</sup>C-NMR of *N*-acetyl-*N*-demethylmayamycin (**1**).

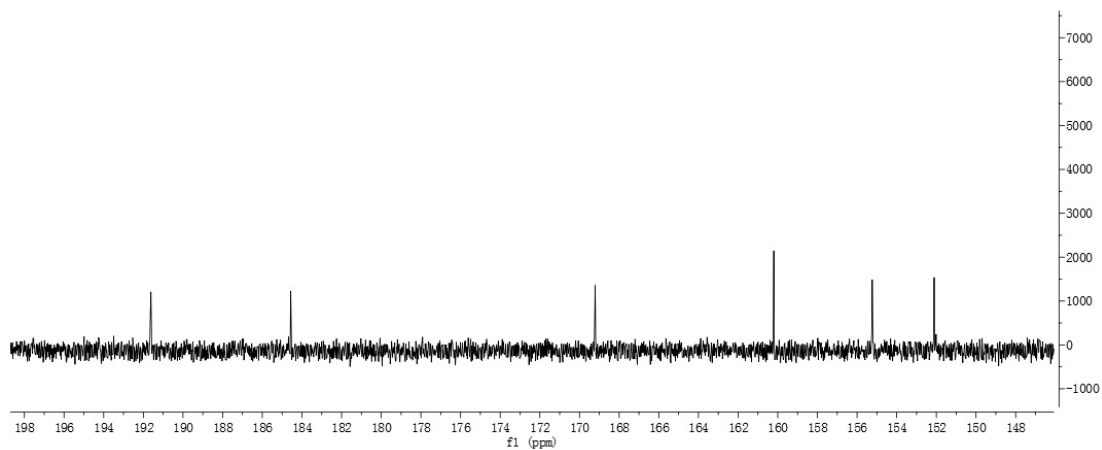

Figure S7. 13C-NMR of *N*-acetyl-*N*-demethylmayamycin (1).

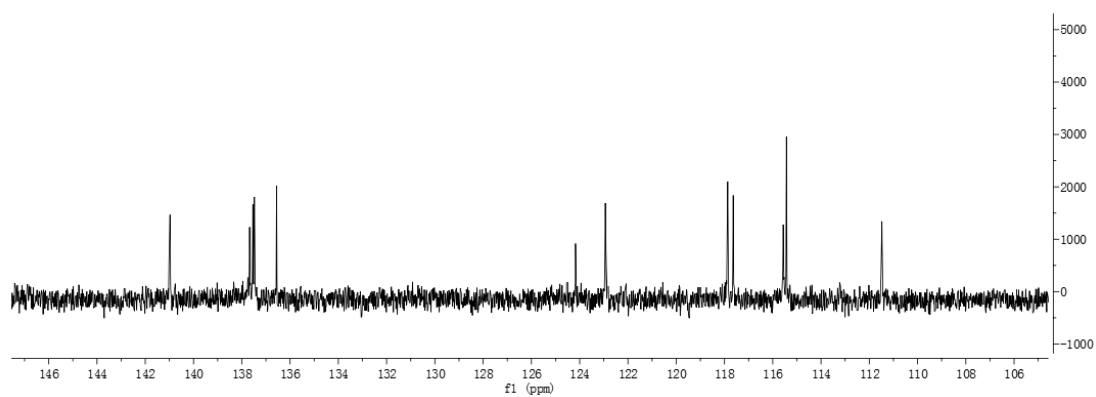

Figure S8. 13C-NMR of *N*-acetyl-*N*-demethylmayamycin (1).

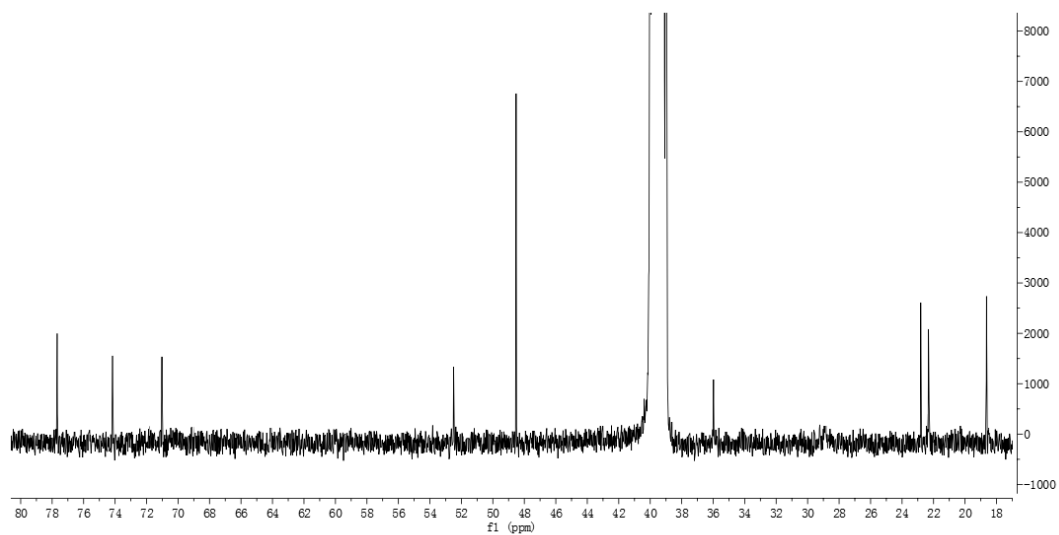

Figure S9. 13C-NMR of *N*-acetyl-*N*-demethylmayamycin (1).

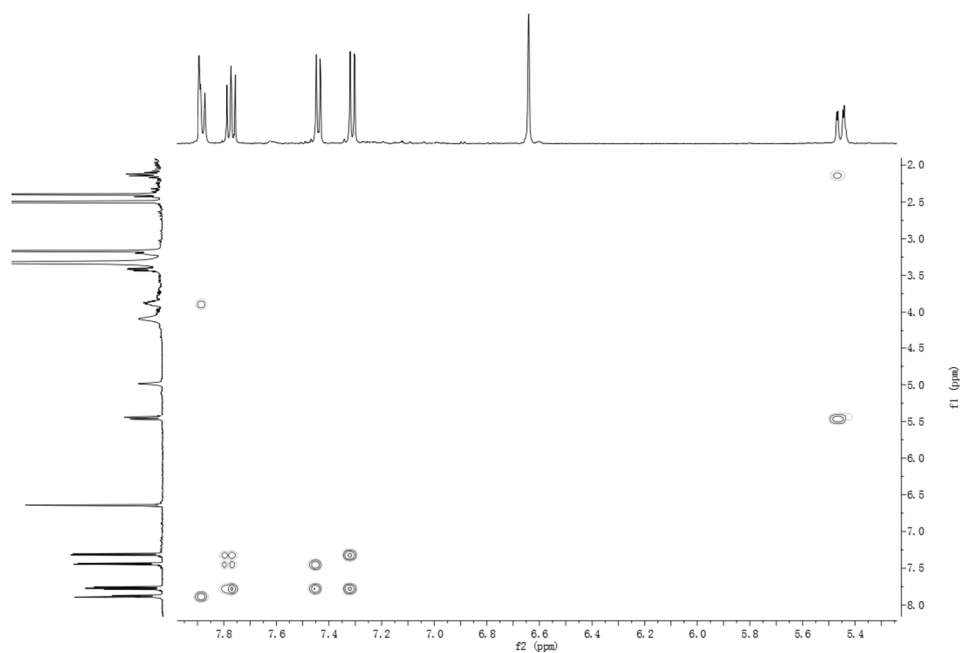

Figure S10. 1H-1H COSY Spectrum of *N*-acetyl-*N*-demethylmayamycin (1).

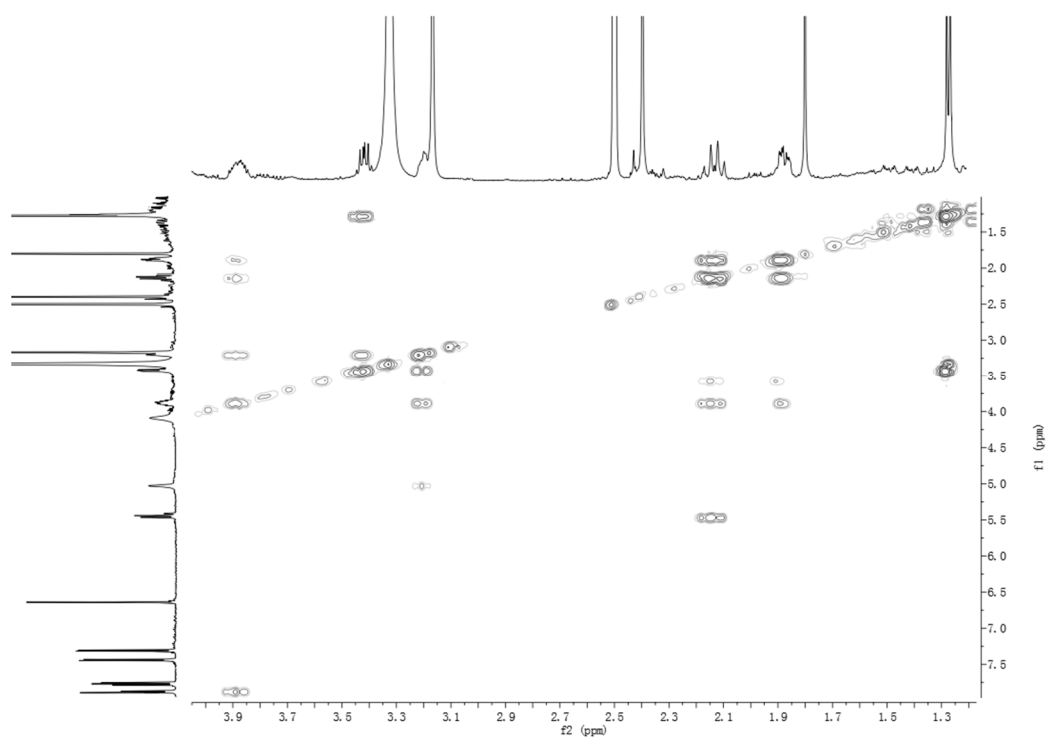

Figure S11. 1H-1H COSY Spectrum of *N*-acetyl-*N*-demethylmayamycin (1).

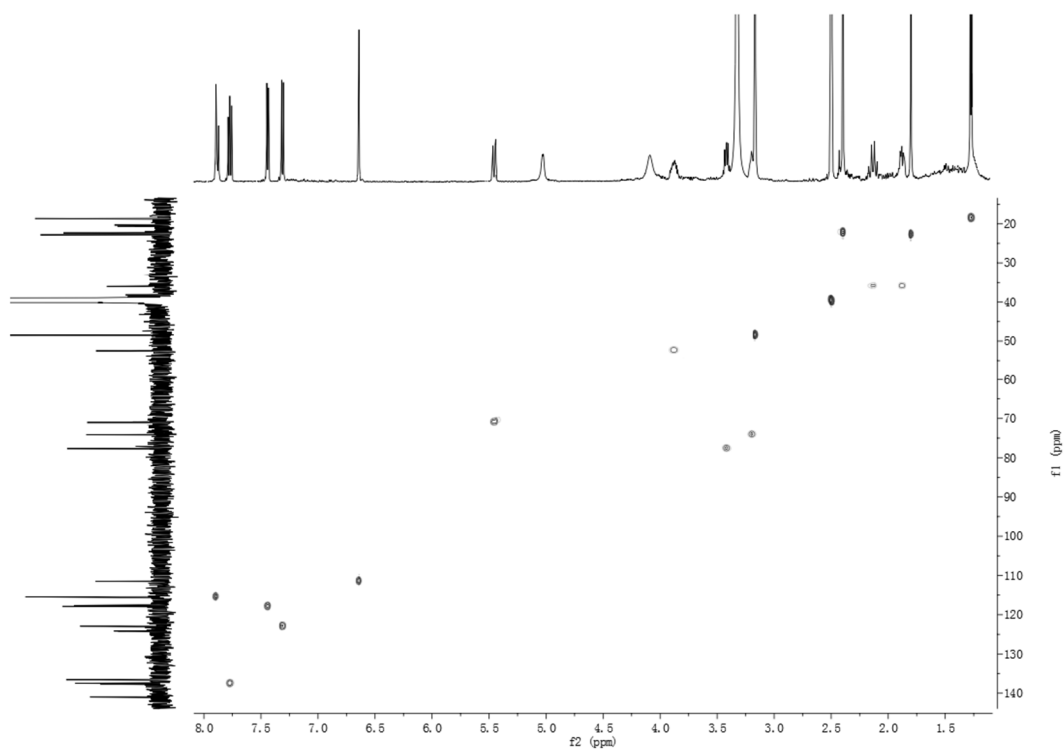

Figure S12. HSQC Spectrum of *N*-acetyl-*N*-demethylmayamycin (1).

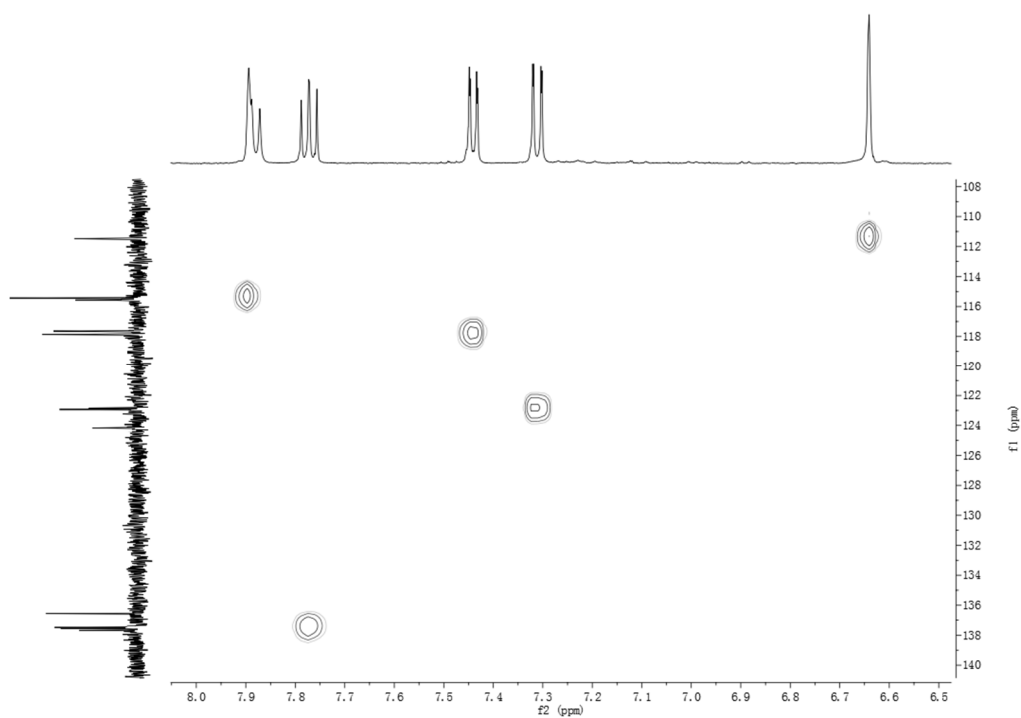

Figure S13. HSQC Spectrum of *N*-acetyl-*N*-demethylmayamycin (1).

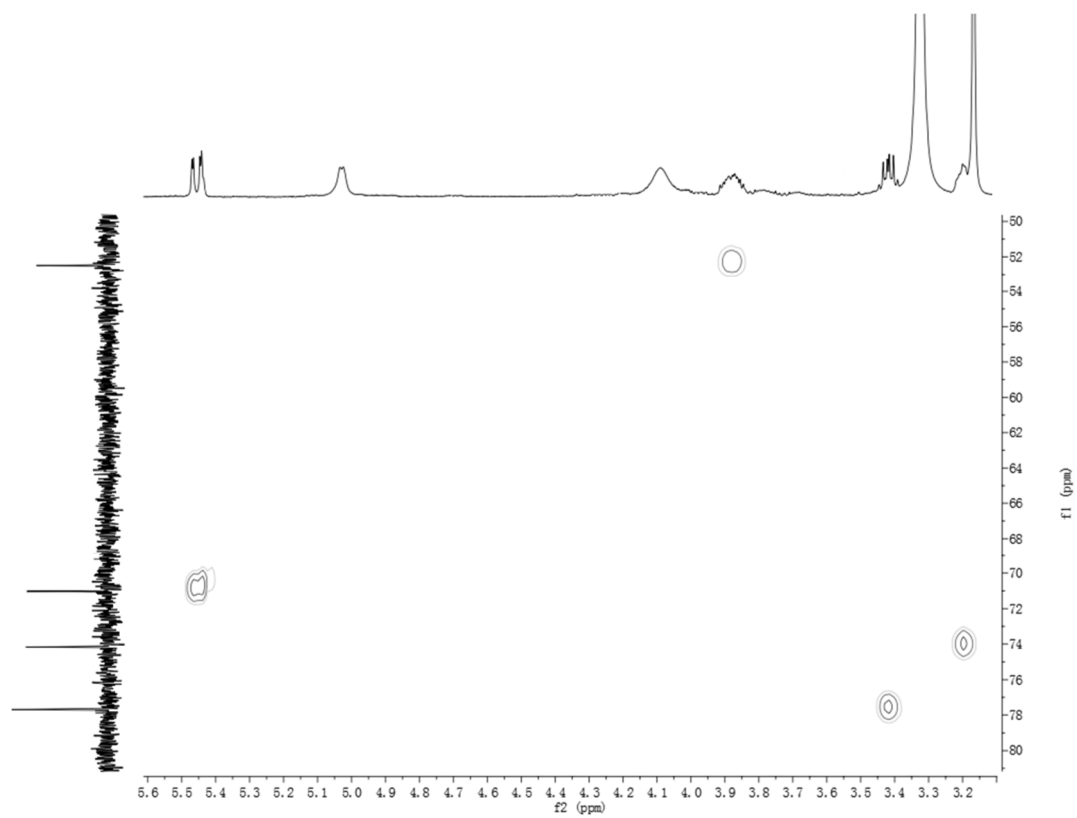

Figure S14. HSQC Spectrum of *N*-acetyl-*N*-demethylmayamycin (1).

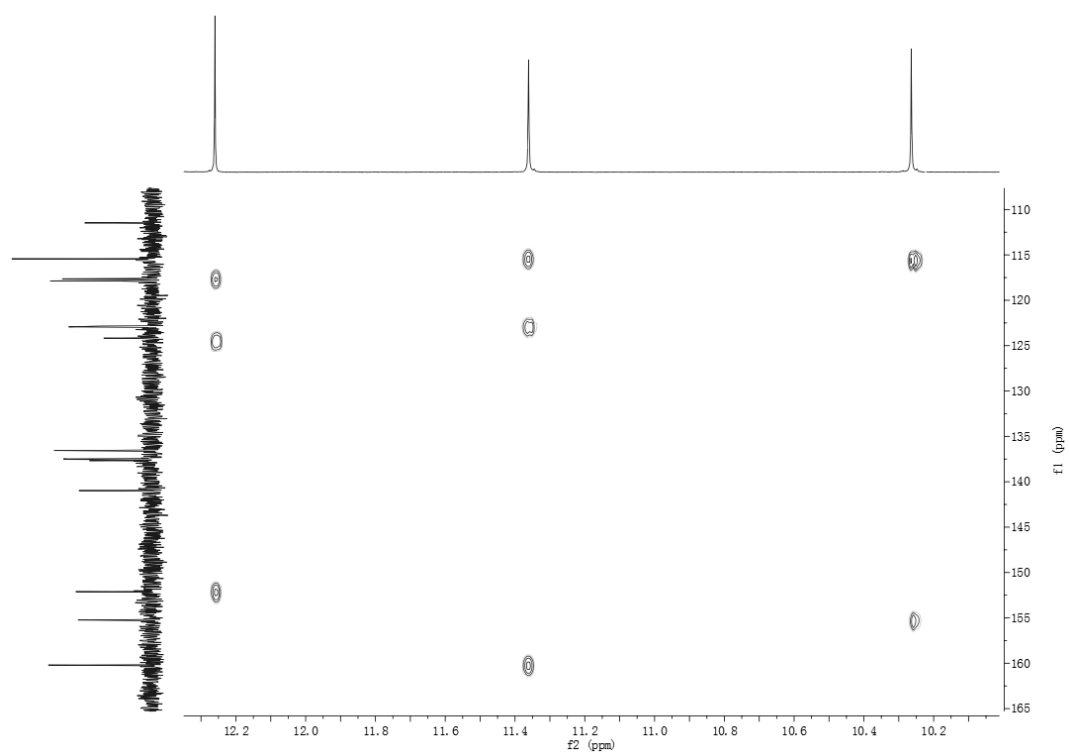

Figure S15. HMBC Spectrum of *N*-acetyl-*N*-demethylmayamycin (1).

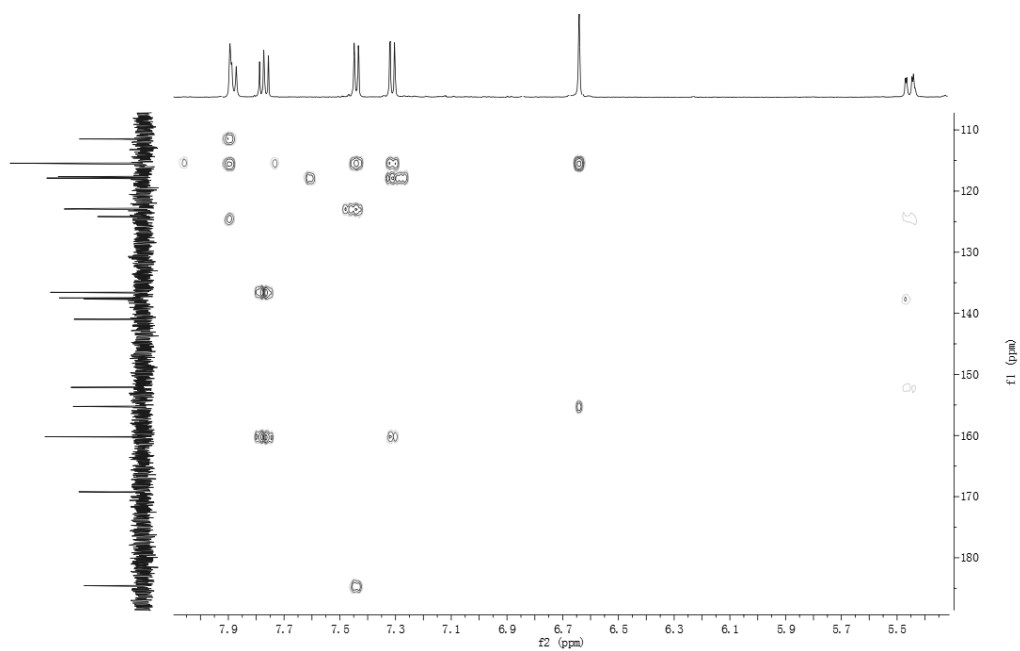

Figure S16. HMBC Spectrum of *N*-acetyl-*N*-demethylmayamycin (1).

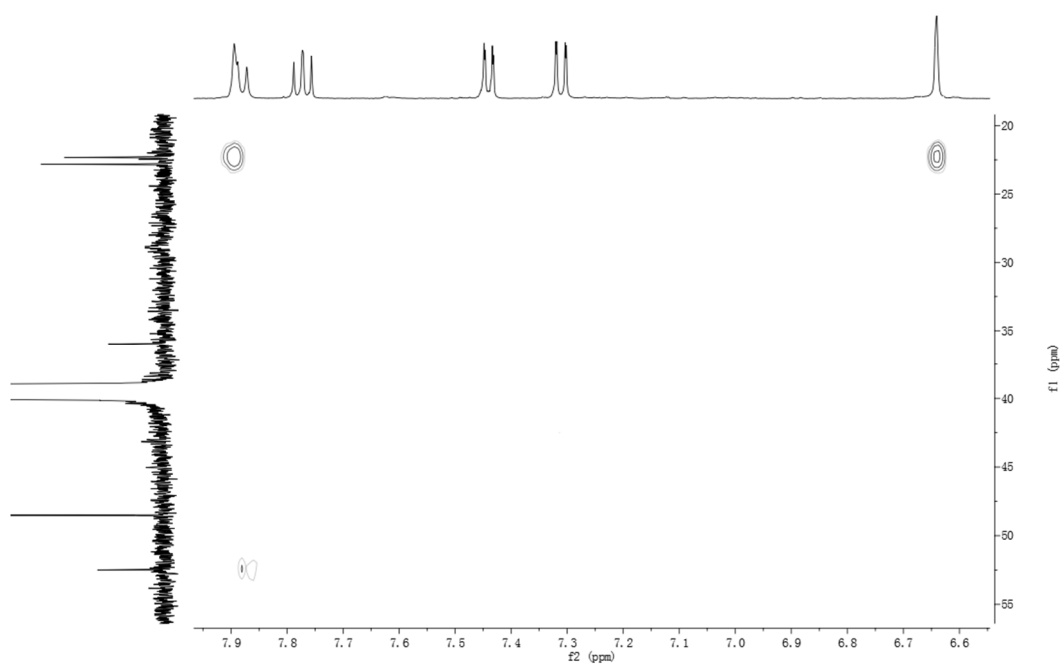

Figure S17. HMBC Spectrum of *N*-acetyl-*N*-demethylmayamycin (1).



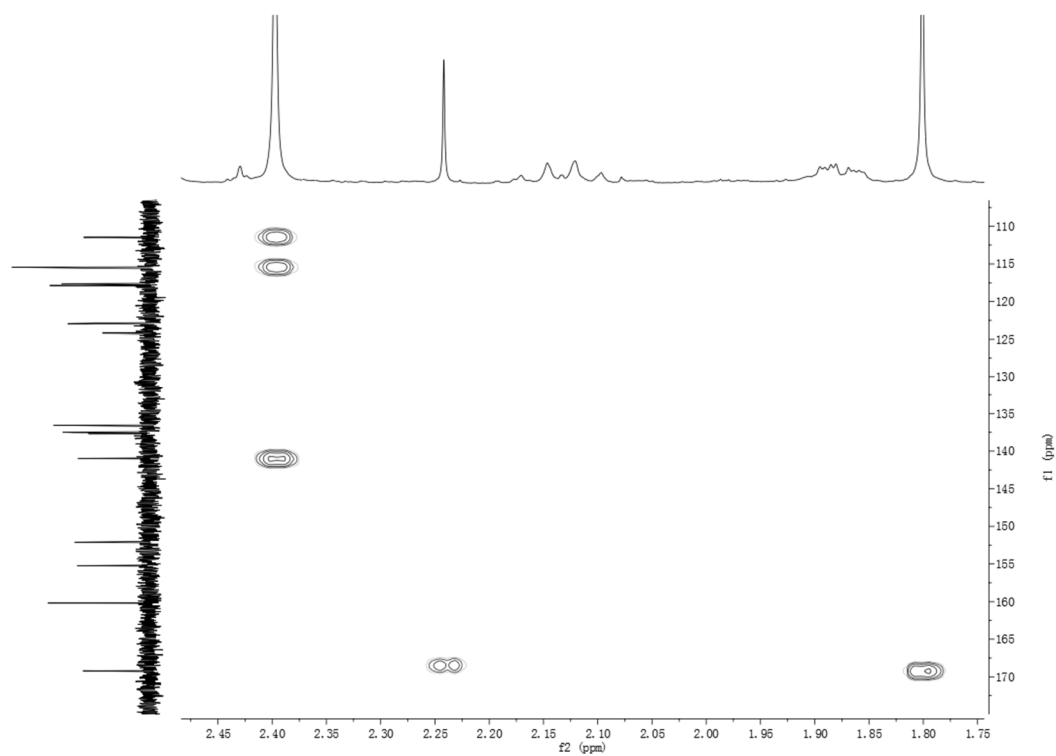

Figure S18. HMBC Spectrum of *N*-acetyl-*N*-demethylmayamycin (1).

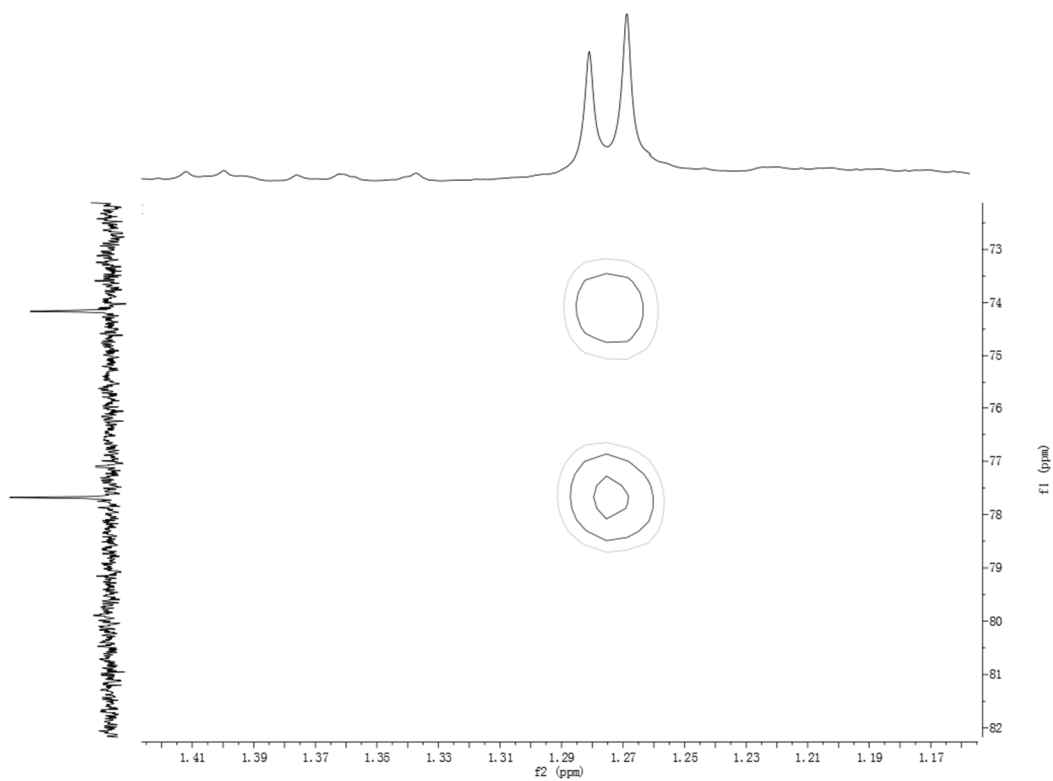

Figure S19. HMBC Spectrum of *N*-acetyl-*N*-demethylmayamycin (1).

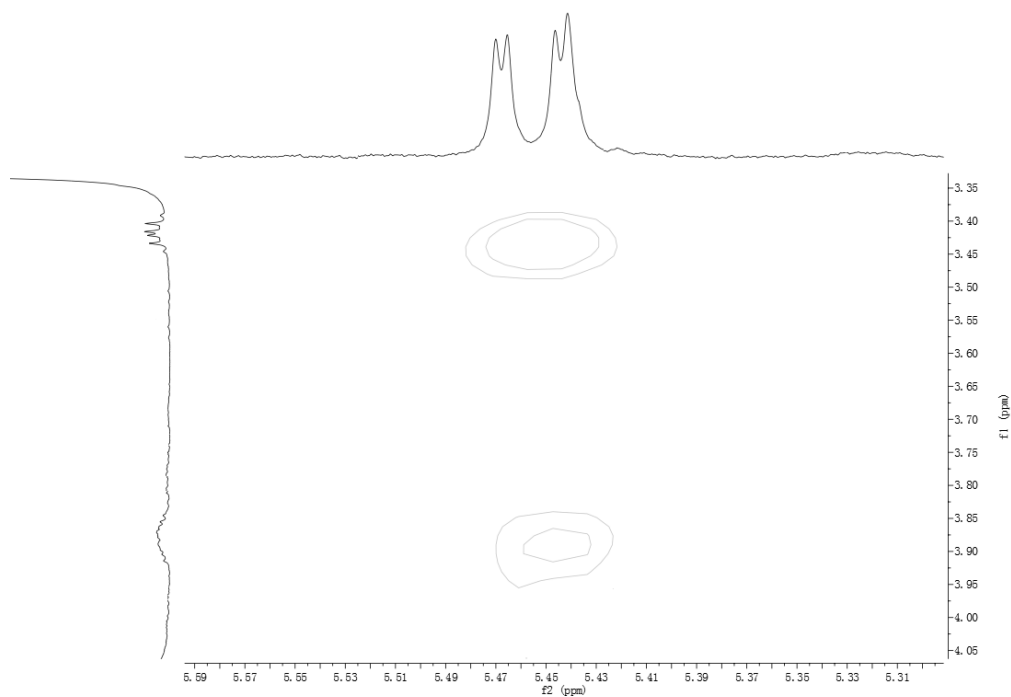

Figure S20. NOESY Spectrum of *N*-acetyl-*N*-demethylmayamycin (1).

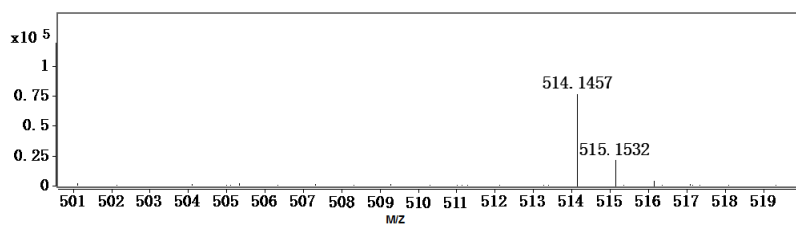

Figure S21. HRESIMS Data of *N*-acetyl-*N*-demethylmayamycin (1).

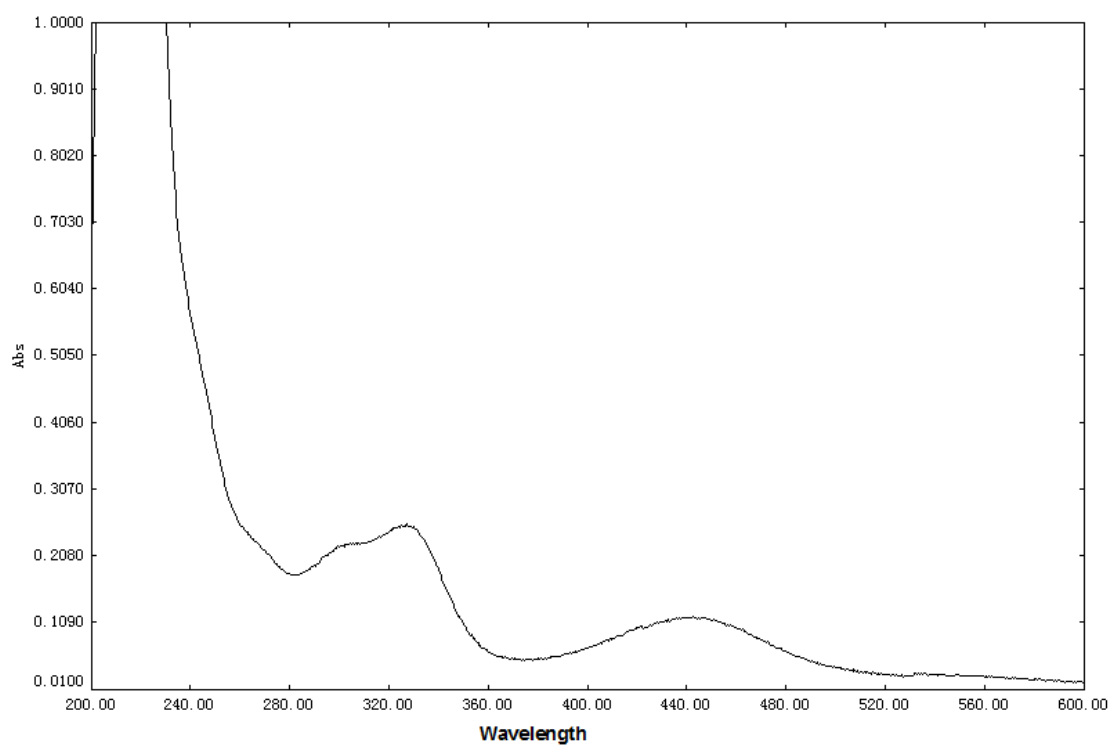

Figure S22. UV spectrum of Streptoanthraquinone A (2).

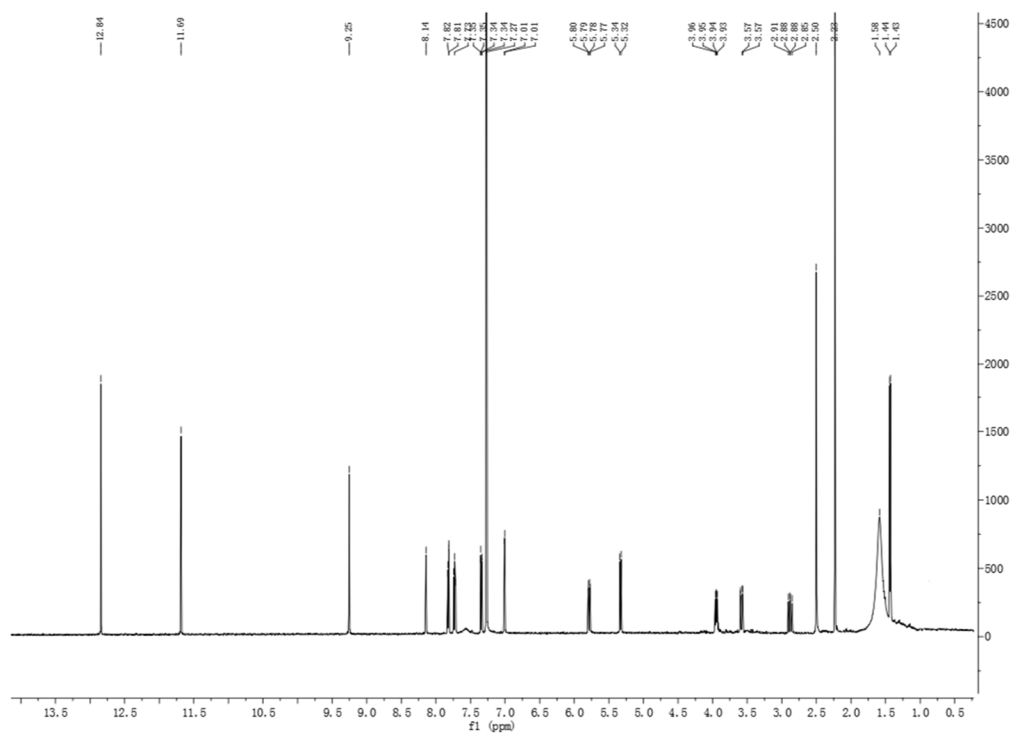

Figure S23. <sup>1</sup>H-NMR of Streptoanthraquinone A (2).

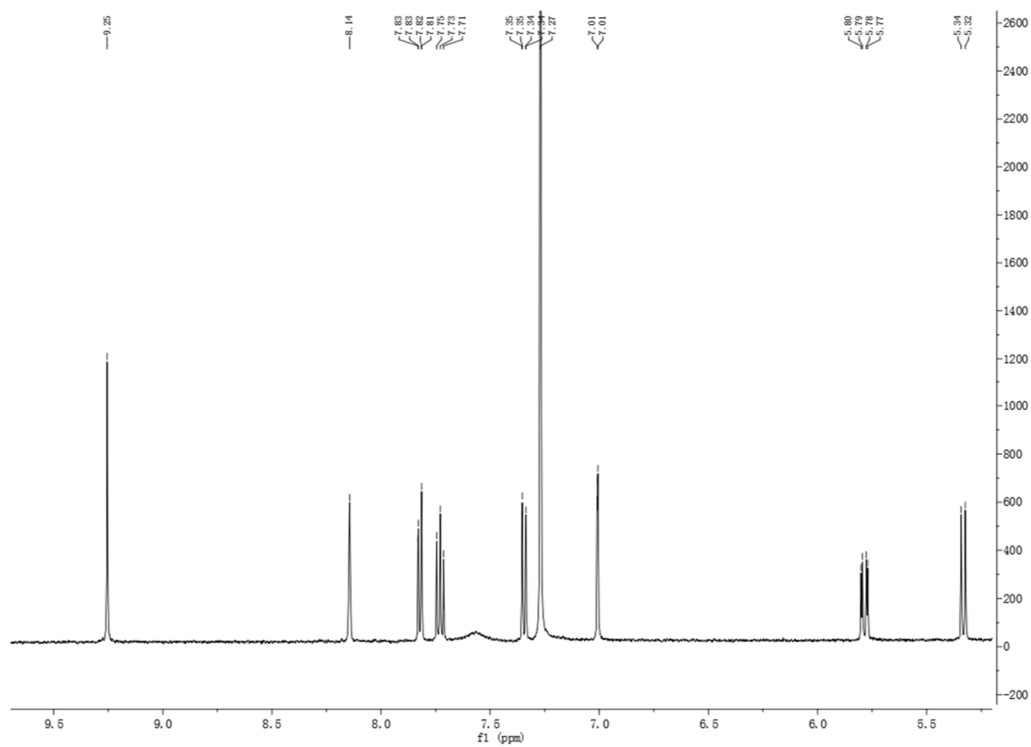

Figure S24. <sup>1</sup>H-NMR of Streptoanthraquinone A (2).

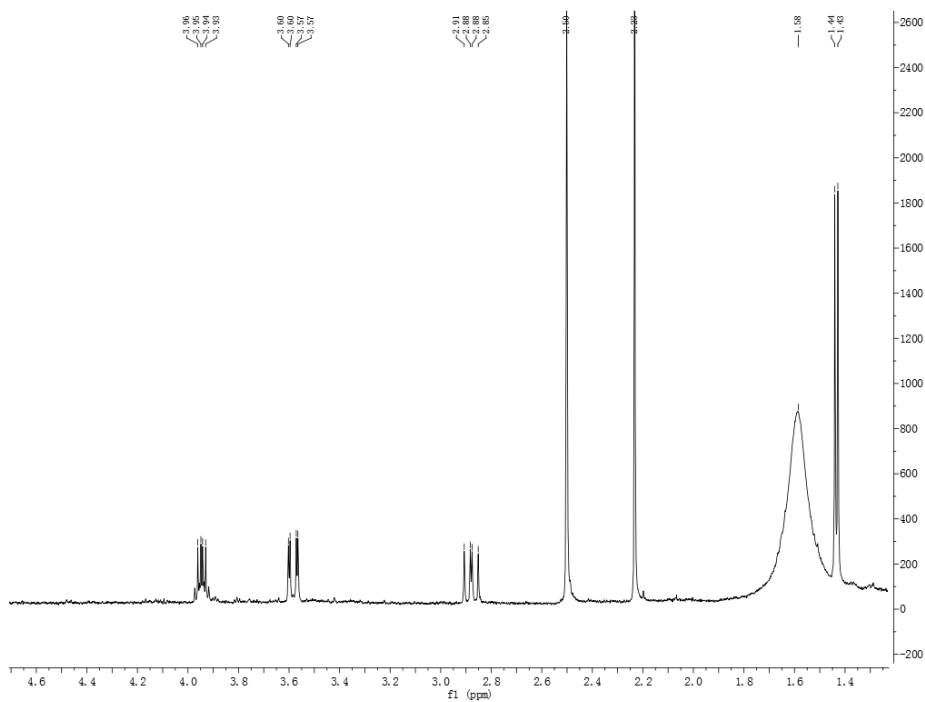

Figure S25. <sup>1</sup>H-NMR Spectrum of Streptoanthraquinone A (2).

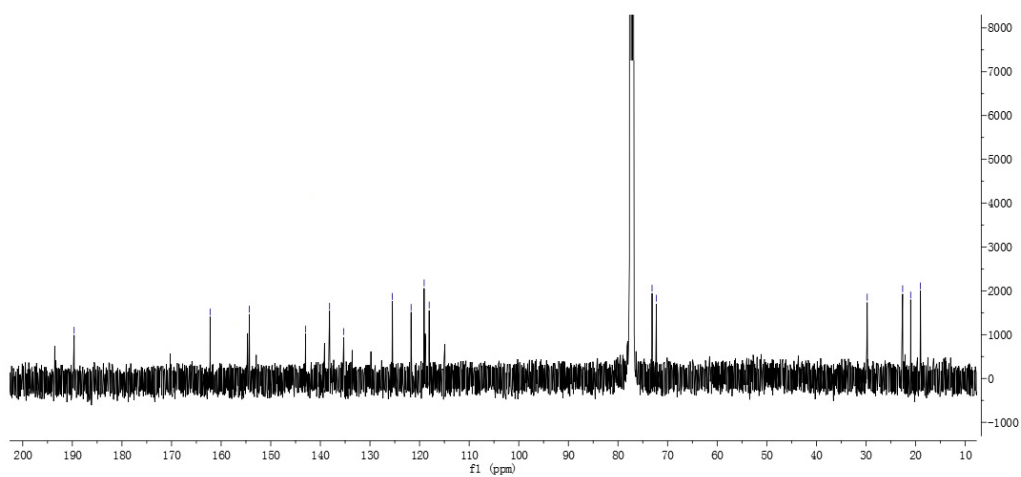

Figure S26. <sup>13</sup>C-NMR Spectrum of Streptoanthraquinone A (2).

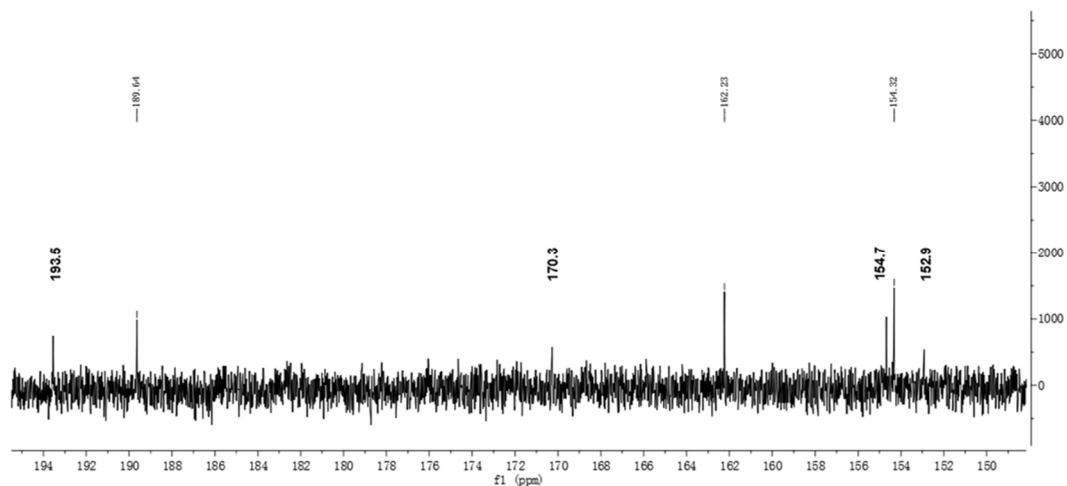

Figure S27. 13C-NMR Spectrum of Streptoanthraquinone A (2).

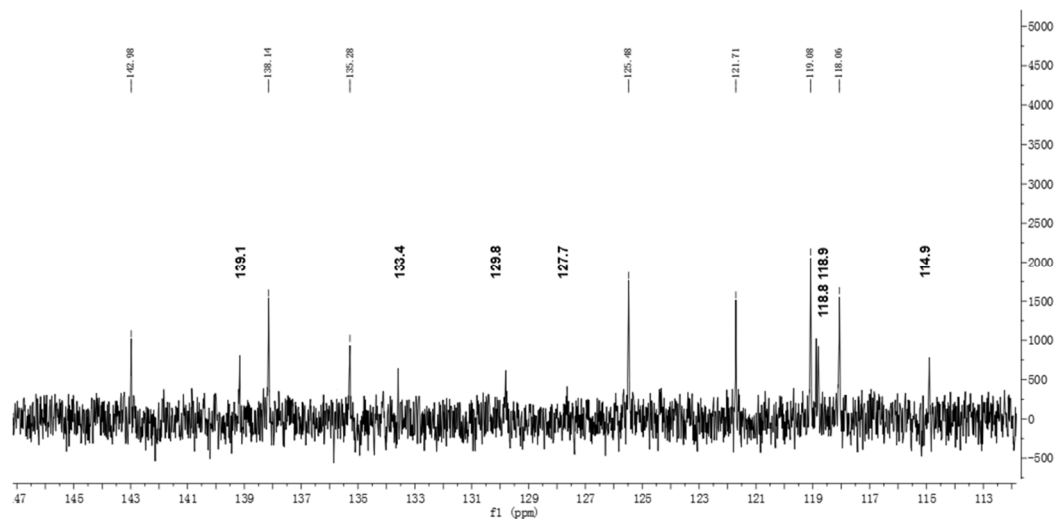

Figure S28. 13C-NMR Spectrum of Streptoanthraquinone A (2).

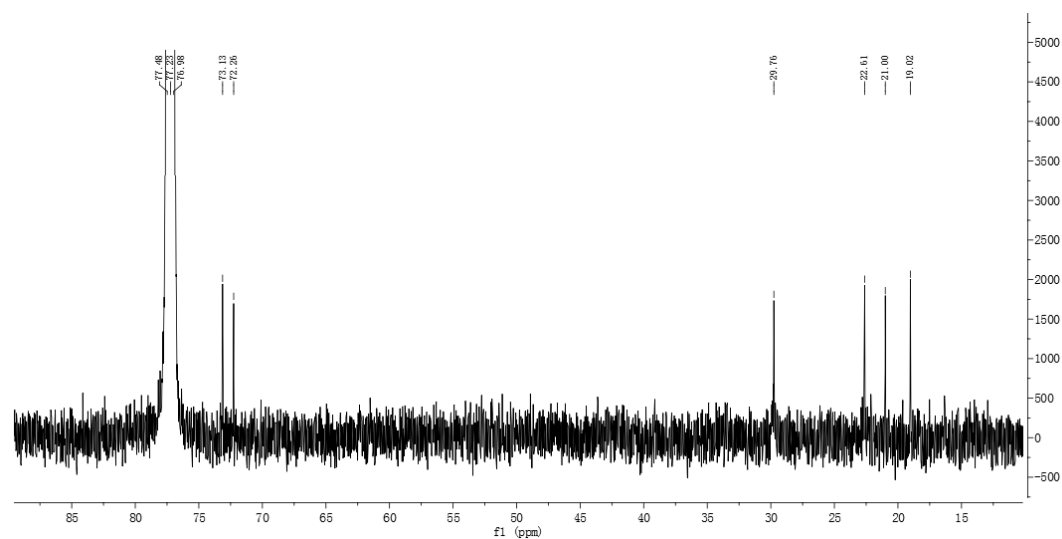

Figure S29. 13C-NMR of Streptoanthraquinone A (2).

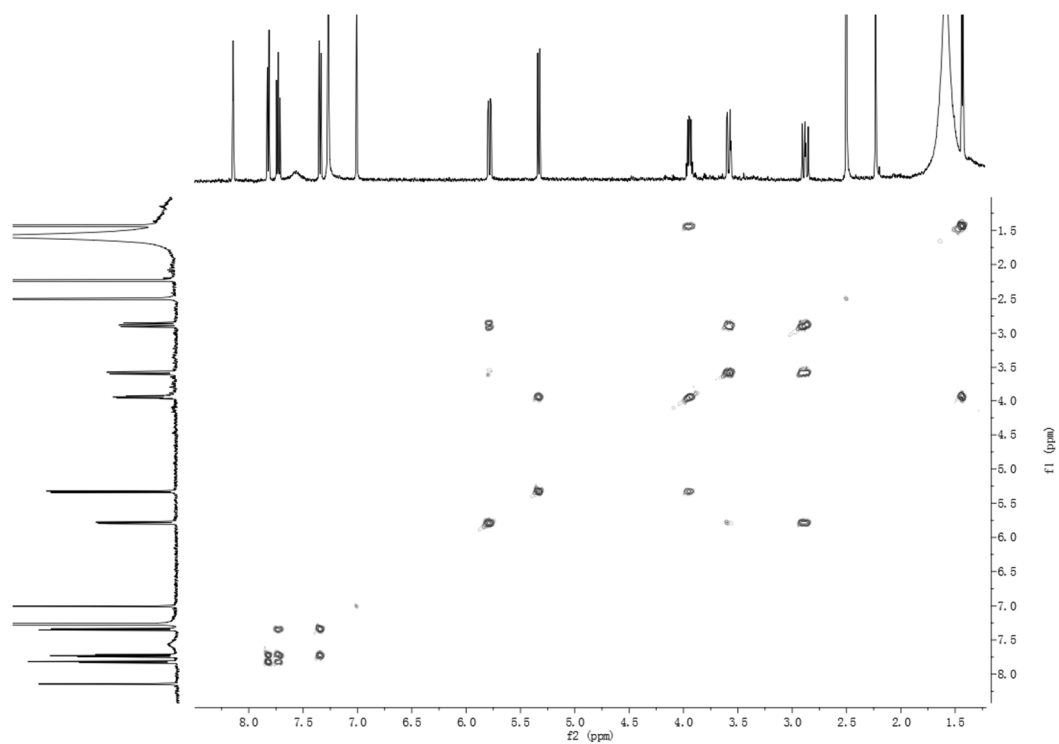

Figure S30. 1H-1H COSY of Streptoanthraquinone A (2).

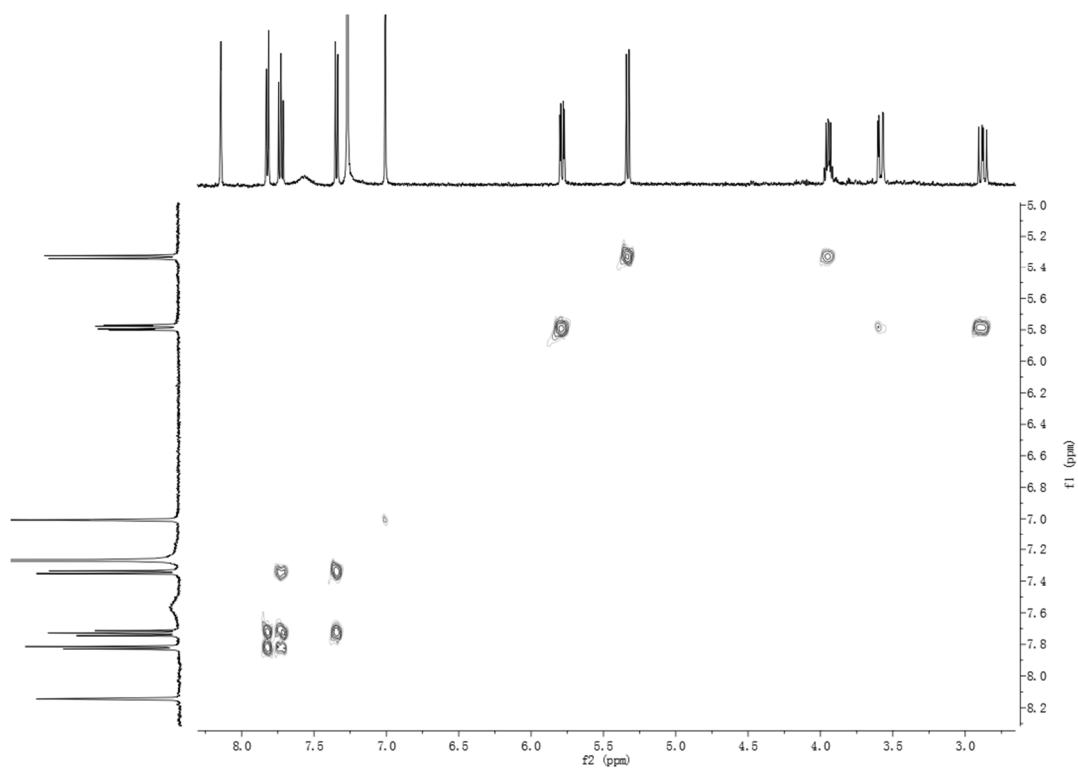

Figure S31. 1H-1H COSY of Streptoanthraquinone A (2).

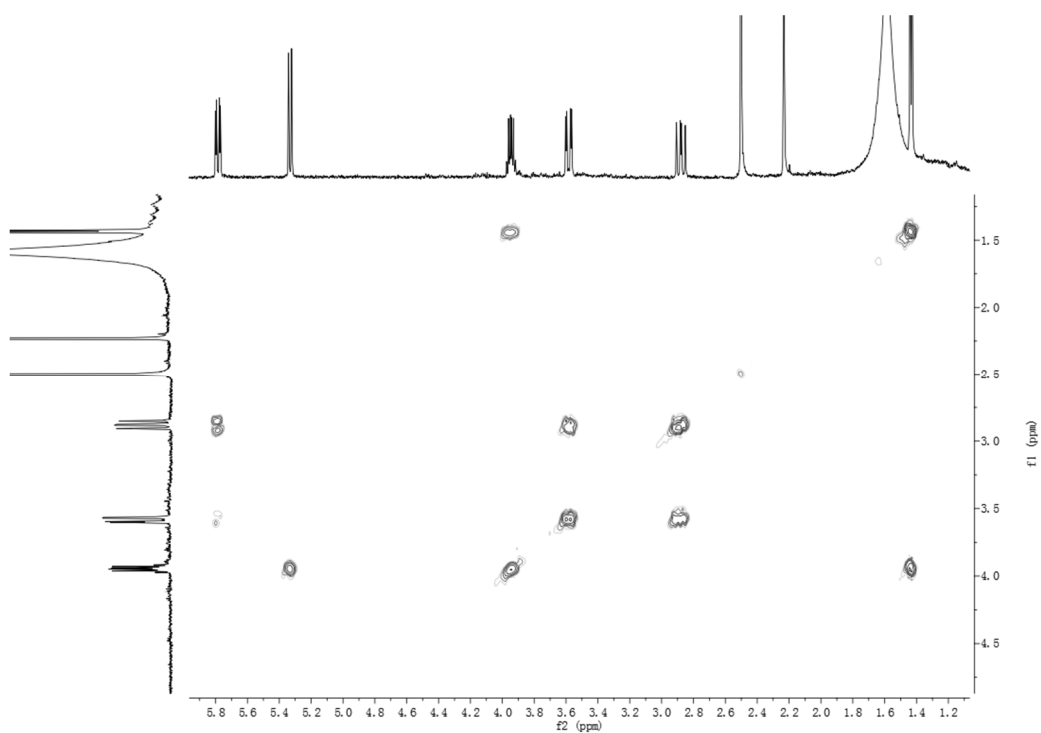

Figure S32. 1H-1H COSY of Streptoanthraquinone A (2).

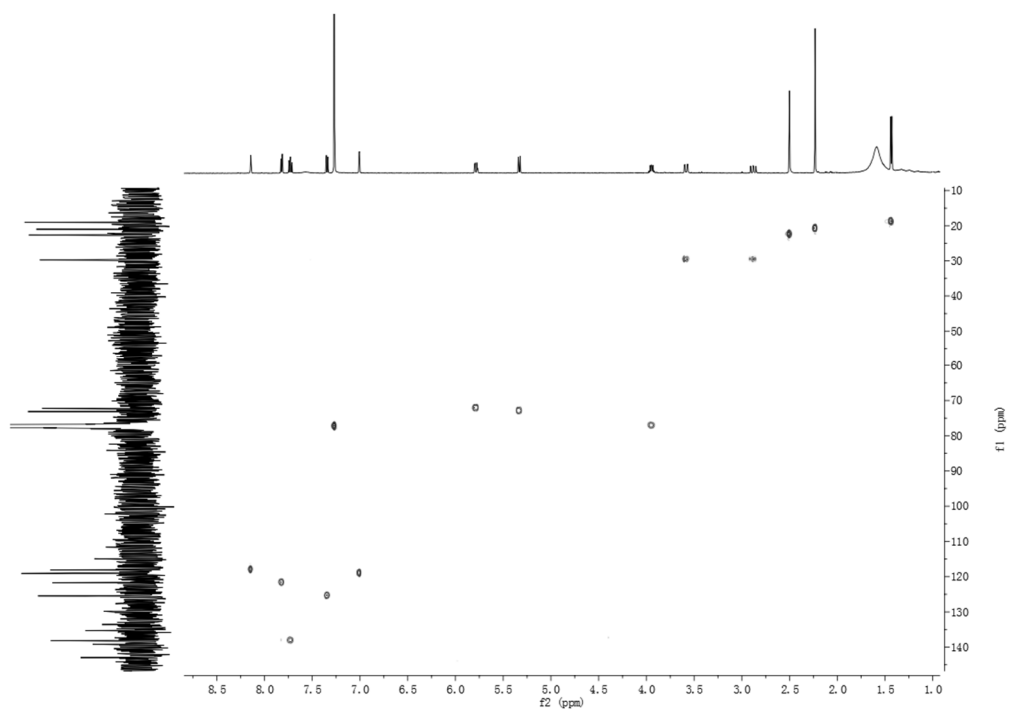

Figure S33. HSQC spectrum of Streptoanthraquinone A (2).

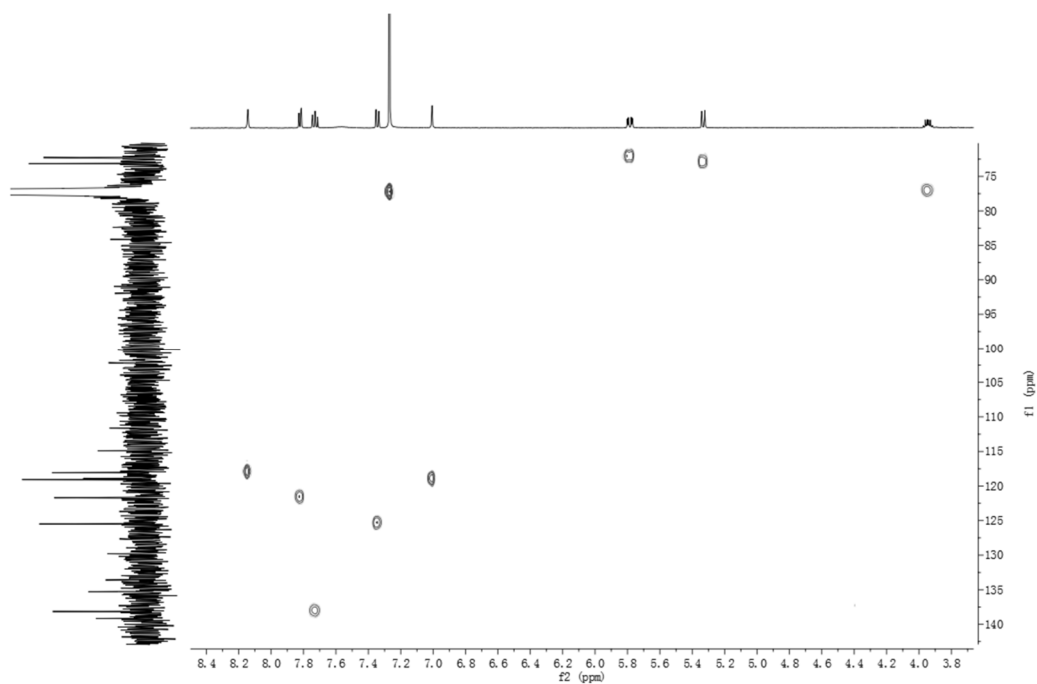

Figure S34. HSQC spectrum of Streptoanthraquinone A (2).

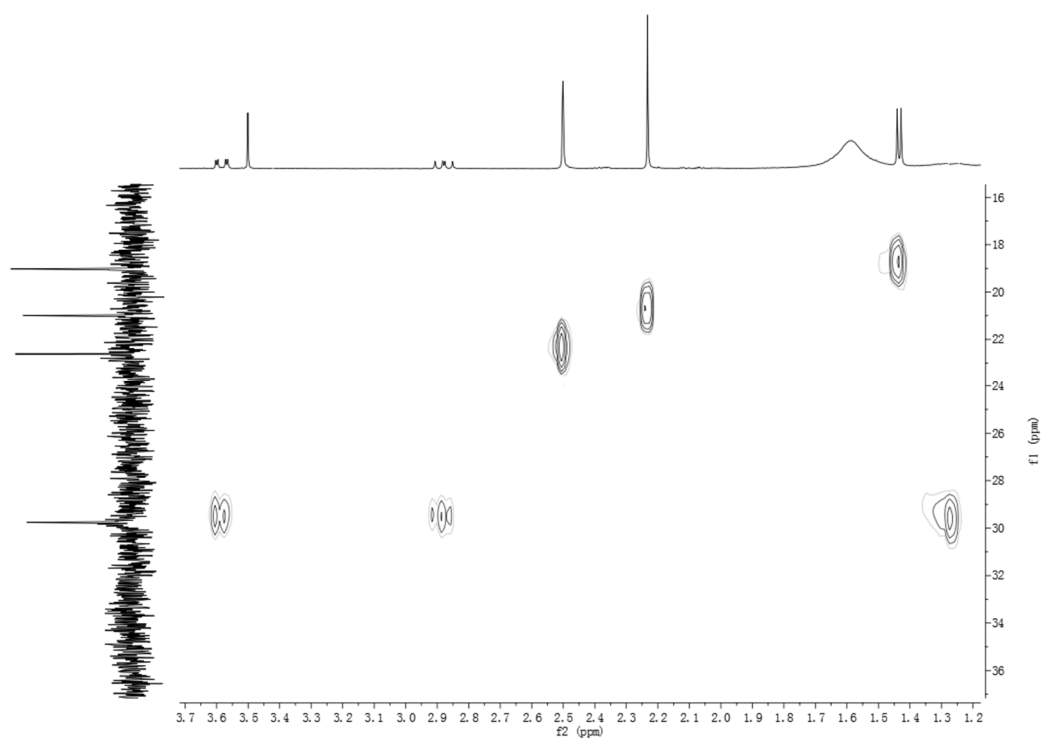

Figure S35. HSQC spectrum of Streptoanthraquinone A (2).



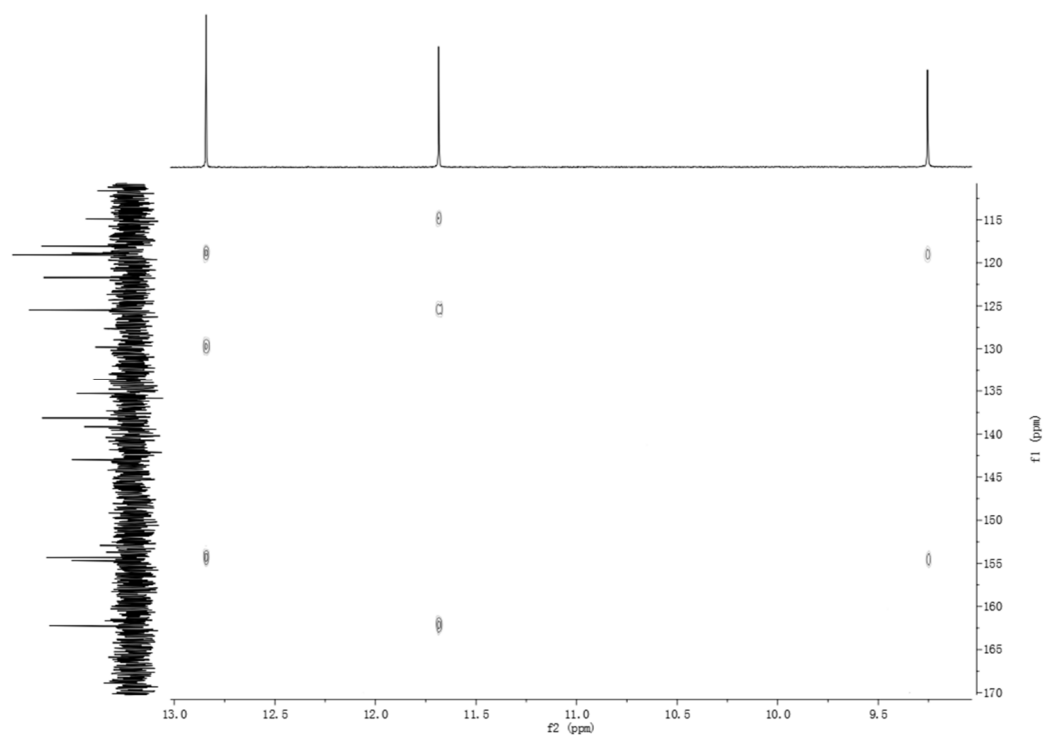

Figure S36. HMBC spectrum of Streptoanthraquinone A (2).

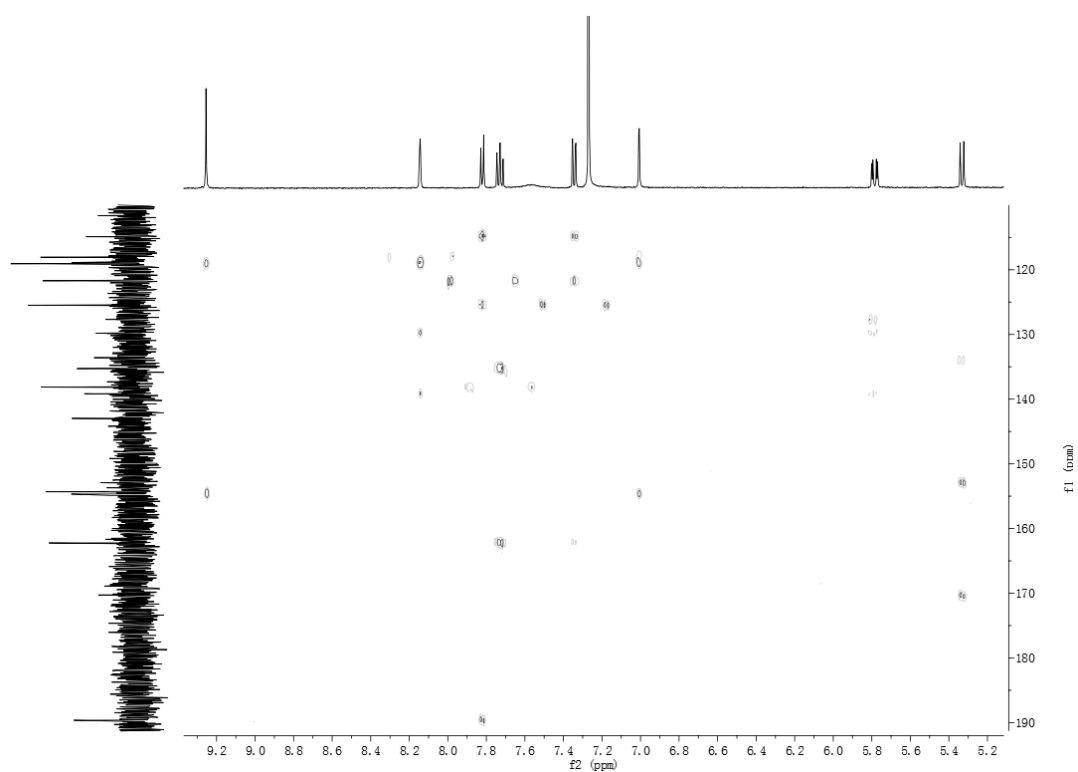

Figure S37. HMBC spectrum of Streptoanthraquinone A (2).

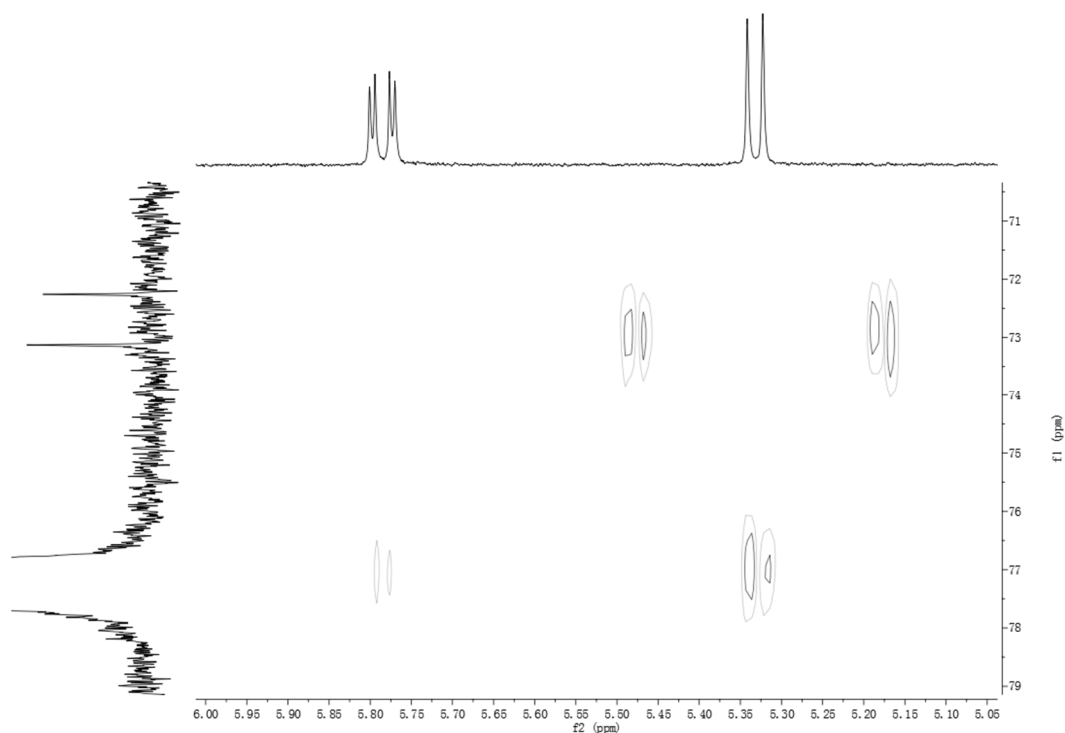

Figure S38. HMBC Spectrum of Streptoanthraquinone A (2).

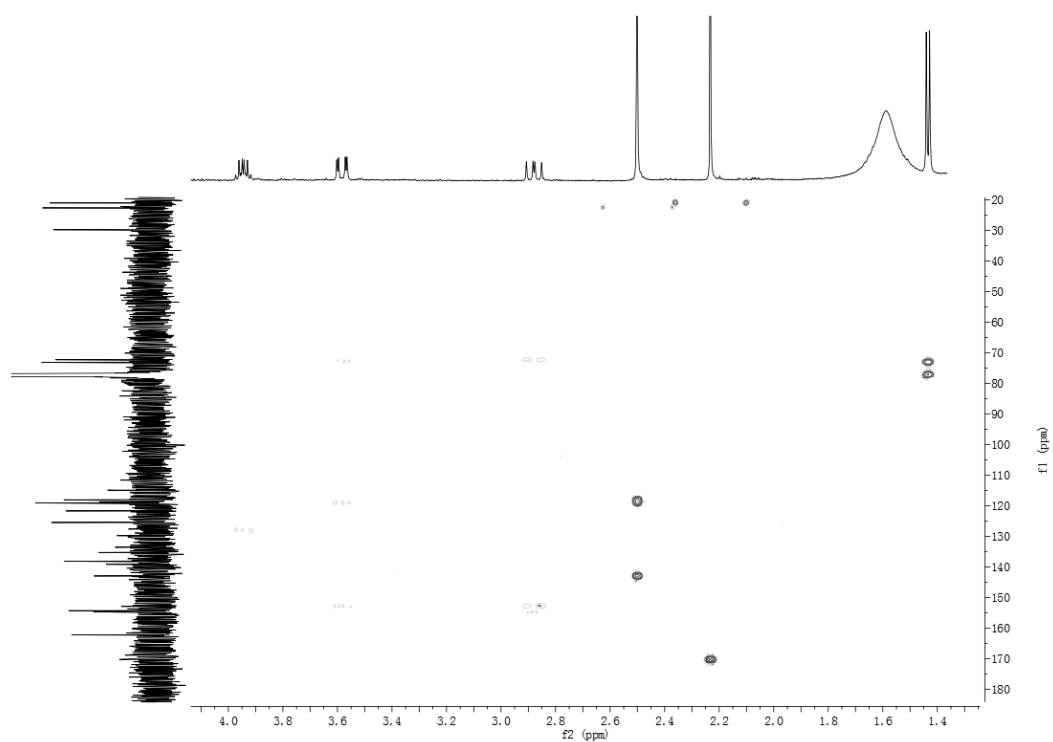

Figure S39. HMBC Spectrum of Streptoanthraquinone A (2).

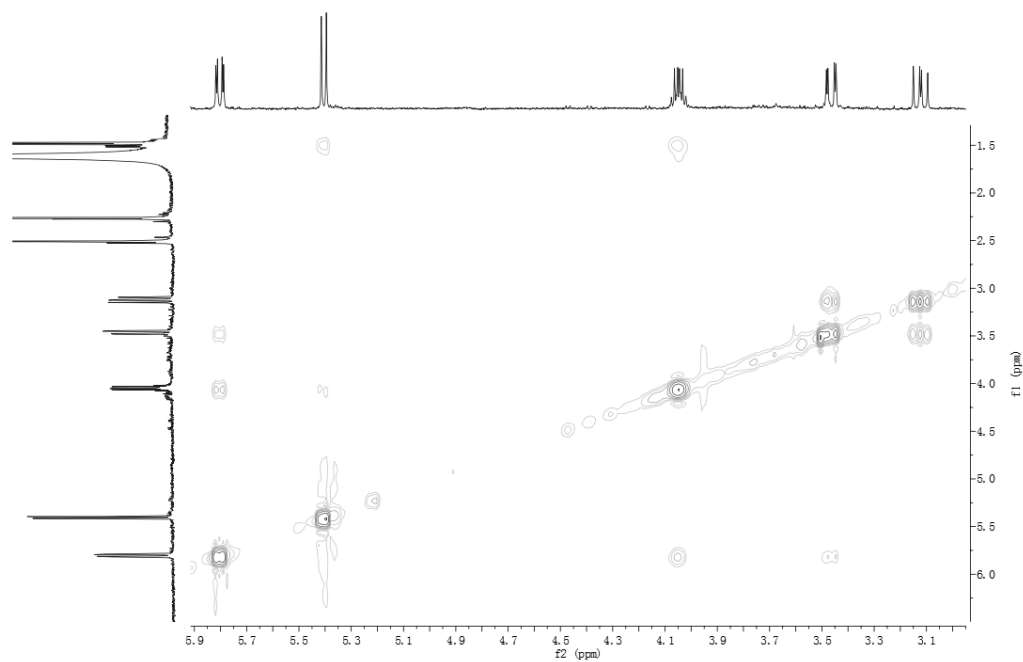

Figure S40. NOESY Spectrum of Streptoanthraquinone A (2).

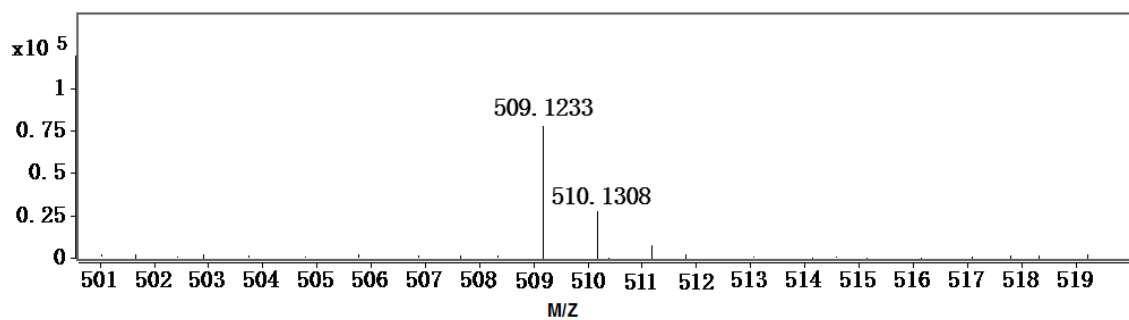

Figure S41. HRESIMS Spectrum of Streptoanthraquinone A (2).

TGCAGTCGAACGATGAAGCCCTTCGGGGTGGATTAGTGGCGAACGGGTGAGTAACACGT  
GGGCAATCTGCCCTTCACTCTGGGACAAGCCCTGGAAACGGGGTCTAATACCGGATAACA  
CTCTGTCCCGCATGGGACGGGGTTGAAAGCTCCGGCGGTGAAGGATGAGCCCGCGGCCT  
ATCAGCTTGTGGTGGGGTAATGGCCTACCAAGGCGACGACGGGTAGCCGGCCTGAGAG  
GGCGACCGGCCACACTGGGACTGAGACACGGCCCAGACTCCTACGGGAGGCAGCAGTGG  
GGAATATTGCACAATGGGCGAAAGCCTGATGCAGCGACGCCGCGTGAGGGATGACGGCC  
TTCGGGTGTAAACCTCTTTCAGCAGGGAAGAAGCGAAAGTGACGGTACCTGCAGAAGA  
AGCGCC-GGCTAACTACGTGCCAGCAGCCGCGGTAATACGTAGGGCGCAAGCGTTGTCCG  
GAATTATTGGGCGTAAAGAGCTCGTAGGCGGCTTGTACGTCCGATGTGAAAGCCCGGG  
GCTTAACCCCGGGTCTGCATTTCGATACGGGCTAGCTAGAGTGTGGTAGGGGAGATCGGAA  
TTCCTGGTGTAGCGGTGAAATGCGCAGATATCAGGAGGAACACCGGTGGCGAAGGCGGA  
TCTCTGGGCCATTACTGACGCTGAGGAGCGAAAGCGTGGGGAGCGAACAGGATTAGATA  
CCCTGGTAGTCCACGCCGTAACGTTGGGAACTAGGTGTTGGCGACATTCCACGTCTGTCG  
GTGCCCGAGCTAACGCATTAAGTTCCCCGCCTGGGGAGTACGGCCGCAAGGCTAAAACCTC  
AAAGGAATTGACGGGGGGCCCGCACAAAGCAGCGGAGCATGTGGCTTAATTCGACGCAACG  
CGAAGAACCTTACCAAGGCTTGACATATACCGGAAAGCATCAGAGATGGTGCSCCCTTG  
TGGTCGGTATACAGGTGGTGCATGG-CTGTCTCAGCTCGTGTCTGTGAGATGTTGGGTAA  
GTCCCACAACGAGCGCAACCCTTGTTCTGTGTTGCCAGCATGCCCTTCGGGG-TGATGGGG  
ACTCACAGGAGACTGCCGGGGTCAACTCGGAGGAAGGTGGGGACGACGTCAAGTCATCA  
TGCCCCATTATGTCTTGGGCTGCACACGTGCTACAATGGCCGGTACAATGAGCTGCGATGC  
CGCGAGGCGGAGCGAATCTCAAAAAGCCGGTCTCAGTTCGGATTGGGGTCTGCAACTCG  
ACCCCATGAAGTCGGAGTTGCTAGTAATCGCAGATCAGCATTGCTGCGGTGAATACGTTCC  
CCGGGCCTGTACACACCGCCCGTACGTCACGAAAGTCGGTAACACCCGAAGCCGGTGG  
CCCAACCC

**Figure S42.** 16S rDNA sequence of *Streptomyces* sp. 182SMLY.

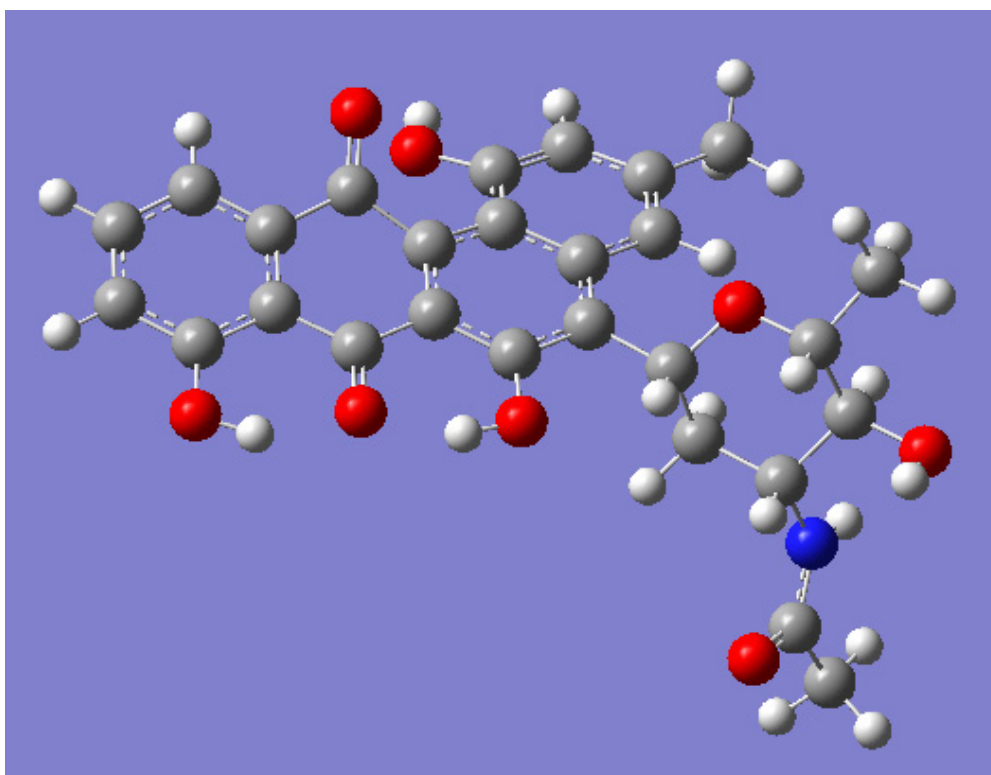

**Figure S43.** The Optimized Geometry of Conformer 1 of (1'R, 3'R, 4'S, 5'R)-1.

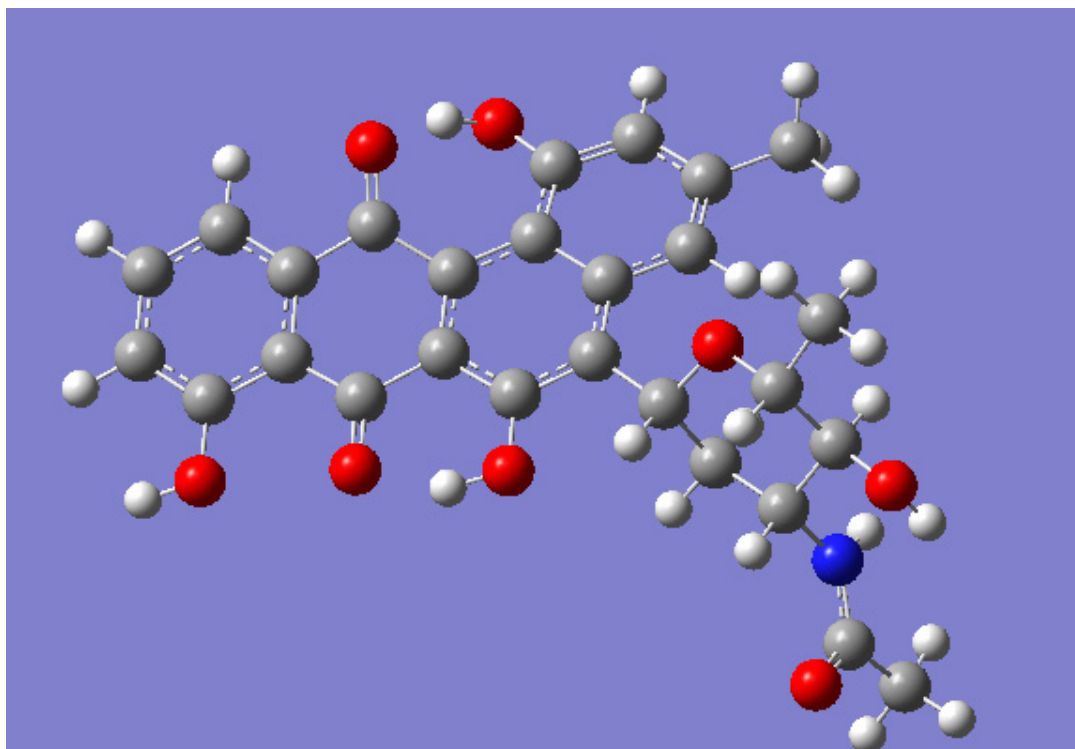

**Figure S44.** The Optimized Geometry of Conformer 2 of (1'R, 3'R, 4'S, 5'R)-1.

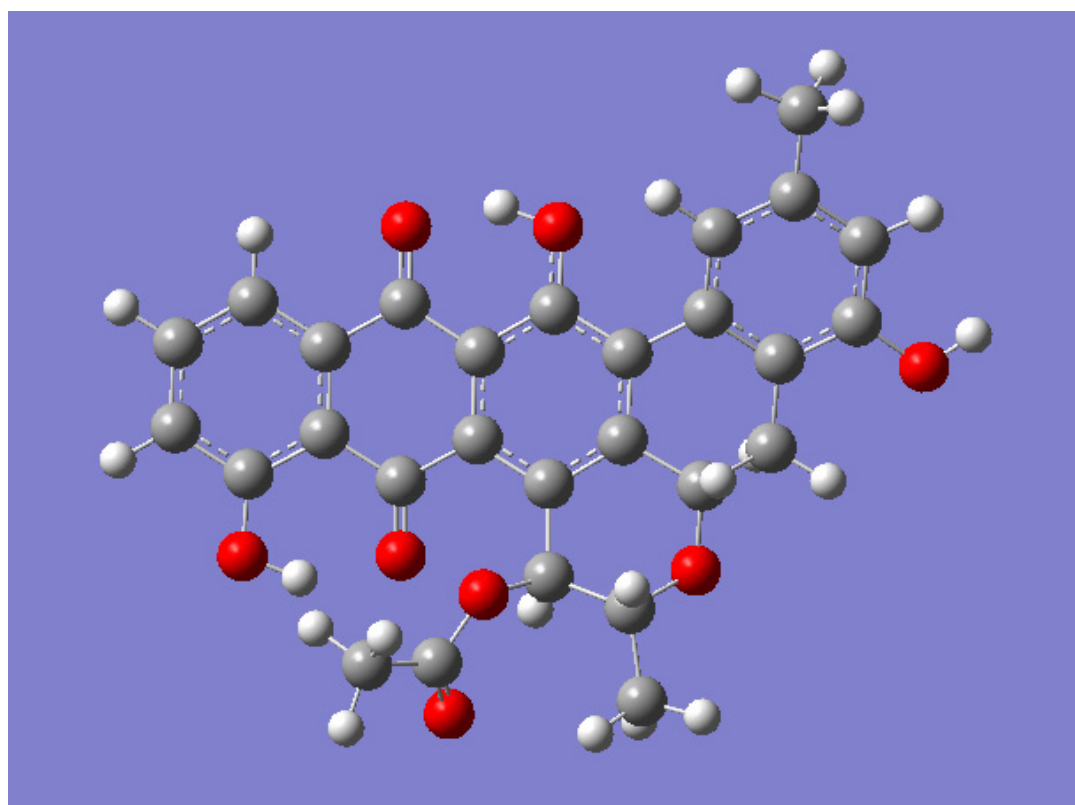

**Figure S45.** The Optimized Geometry of Conformer 1 of (6'S, 16'R, 17'R)-2.

**Table S1.** Sequences producing significant alignments.

| Accession   | Description                                                             | Max Score | Total Score | Query Coverage | Evalue | Ident |
|-------------|-------------------------------------------------------------------------|-----------|-------------|----------------|--------|-------|
| KF981731.1  | <i>Streptomyces griseus</i> strain CB00830 16S ribosomal RNA gene       | 2542      | 2542        | 100%           | 0.0    | 100%  |
| HQ6074.11.1 | <i>Streptomyces pluricolorescens</i> strain 999 16S ribosomal RNA gene  | 2542      | 2542        | 100%           | 0.0    | 100%  |
| FJ792544.1  | <i>Streptomyces tricolor</i> strain fc3055 16S ribosomal RNA gene       | 2542      | 2542        | 100%           | 0.0    | 100%  |
| EU7814.91.1 | <i>Streptomyces sporovirgulis</i> strain L0801 16S ribosomal RNA gene   | 2542      | 2542        | 100%           | 0.0    | 100%  |
| EU257232.1  | <i>Streptomyces</i> sp. A15Ydz-AH 16S ribosomal RNA gene                | 2542      | 2542        | 100%           | 0.0    | 100%  |
| EU119184.1  | <i>Streptomyces</i> sp. HBUM74775 16S ribosomal RNA gene                | 2542      | 2542        | 100%           | 0.0    | 100%  |
| JQ654447.1  | <i>Streptomyces sporovirgulis</i> strain TGNBSA5 16S ribosomal RNA gene | 2540      | 2540        | 99%            | 0.0    | 100%  |

**Table S2.** Optimized Z-Matrixes of Conformer 1 of (1'R, 3'R, 4'S, 5'R)-1. Standard orientation.

| Center Number | Atomic Number | Atomic Type | Coordinates (Angstroms) |          |          |
|---------------|---------------|-------------|-------------------------|----------|----------|
|               |               |             | X                       | Y        | Z        |
| 1             | 6             | 0           | -6.57339                | -2.12099 | -0.20611 |
| 2             | 6             | 0           | -5.22477                | -2.43785 | 0.036568 |
| 3             | 6             | 0           | -4.27011                | -1.3966  | 0.13893  |
| 4             | 6             | 0           | -4.70468                | -0.0561  | 0.032749 |
| 5             | 6             | 0           | -6.04365                | 0.247081 | -0.17531 |
| 6             | 6             | 0           | -6.97149                | -0.79675 | -0.31107 |
| 7             | 6             | 0           | -2.86044                | -1.68059 | 0.384568 |
| 8             | 6             | 0           | -3.71602                | 1.038823 | 0.209917 |
| 9             | 6             | 0           | -2.27202                | 0.717085 | 0.000235 |
| 10            | 6             | 0           | -1.87148                | -0.59079 | 0.319624 |
| 11            | 6             | 0           | -0.48253                | -0.86923 | 0.52819  |
| 12            | 6             | 0           | 0.472659                | 0.146009 | 0.478701 |
| 13            | 6             | 0           | 0.090126                | 1.444061 | 0.018538 |
| 14            | 6             | 0           | -1.29802                | 1.711967 | -0.28777 |
| 15            | 1             | 0           | -7.28637                | -2.9349  | -0.29543 |
| 16            | 1             | 0           | -6.35685                | 1.283296 | -0.24217 |
| 17            | 1             | 0           | -8.017                  | -0.56637 | -0.49496 |
| 18            | 6             | 0           | -1.59956                | 2.946777 | -0.96337 |
| 19            | 6             | 0           | -0.63525                | 3.91536  | -1.13266 |
| 20            | 1             | 0           | -0.89969                | 4.839408 | -1.64285 |
| 21            | 6             | 0           | 0.699535                | 3.701631 | -0.71189 |
| 22            | 6             | 0           | 1.048479                | 2.479953 | -0.17527 |
| 23            | 1             | 0           | 2.075766                | 2.299137 | 0.105377 |
| 24            | 6             | 0           | 1.717171                | 4.796356 | -0.90129 |
| 25            | 1             | 0           | 1.451636                | 5.68382  | -0.31185 |
| 26            | 1             | 0           | 2.716837                | 4.472867 | -0.59592 |
| 27            | 1             | 0           | 1.764103                | 5.116145 | -1.95009 |
| 28            | 8             | 0           | -4.90258                | -3.73863 | 0.162969 |
| 29            | 1             | 0           | -3.93161                | -3.78506 | 0.353745 |
| 30            | 8             | 0           | -0.06274                | -2.12326 | 0.812715 |
| 31            | 1             | 0           | -0.86411                | -2.71054 | 0.816762 |

Table S2. Cont.

| Center Number | Atomic Number | Atomic Type | Coordinates (Angstroms) |          |          |
|---------------|---------------|-------------|-------------------------|----------|----------|
|               |               |             | X                       | Y        | Z        |
| 32            | 8             | 0           | -4.07807                | 2.141094 | 0.616494 |
| 33            | 8             | 0           | -2.49044                | -2.86805 | 0.599146 |
| 34            | 6             | 0           | 2.742257                | -0.56084 | -0.44462 |
| 35            | 6             | 0           | 1.90254                 | -0.2594  | 0.807303 |
| 36            | 6             | 0           | 4.166068                | -0.98135 | -0.04063 |
| 37            | 1             | 0           | 2.783012                | 0.323388 | -1.09103 |
| 38            | 1             | 0           | 1.853156                | -1.17651 | 1.405948 |
| 39            | 6             | 0           | 4.784373                | 0.042681 | 0.922754 |
| 40            | 1             | 0           | 4.116066                | -1.94762 | 0.473586 |
| 41            | 6             | 0           | 3.826852                | 0.325443 | 2.100374 |
| 42            | 1             | 0           | 4.963172                | 0.984245 | 0.387873 |
| 43            | 1             | 0           | 3.702804                | -0.61233 | 2.669047 |
| 44            | 1             | 0           | 2.273241                | -1.37088 | -1.01425 |
| 45            | 8             | 0           | 2.541593                | 0.742557 | 1.614566 |
| 46            | 6             | 0           | 4.333989                | 1.422545 | 3.022094 |
| 47            | 1             | 0           | 3.63765                 | 1.573466 | 3.853869 |
| 48            | 1             | 0           | 5.311092                | 1.151296 | 3.431983 |
| 49            | 1             | 0           | 4.435553                | 2.368802 | 2.477326 |
| 50            | 8             | 0           | 6.065794                | -0.37494 | 1.390407 |
| 51            | 1             | 0           | 5.952001                | -1.22804 | 1.845724 |
| 52            | 7             | 0           | 5.022492                | -1.17524 | -1.20512 |
| 53            | 6             | 0           | 5.237978                | -2.37766 | -1.78539 |
| 54            | 8             | 0           | 4.751606                | -3.43154 | -1.34226 |
| 55            | 6             | 0           | 6.11987                 | -2.37871 | -3.01597 |
| 56            | 1             | 0           | 5.562763                | -2.81981 | -3.8497  |
| 57            | 1             | 0           | 6.465406                | -1.38227 | -3.30541 |
| 58            | 1             | 0           | 6.989353                | -3.01848 | -2.82809 |
| 59            | 1             | 0           | 5.419609                | -0.34999 | -1.63877 |
| 60            | 8             | 0           | -2.83922                | 3.09323  | -1.50742 |
| 61            | 1             | 0           | -2.8735                 | 3.936539 | -1.99307 |

Table S3. Optimized Z-Matrixes of of Conformer 2 of (1'R, 3'R, 4'S, 5'R)-1. Standard orientation.

| Center Number | Atomic Number | Atomic Type | Coordinates (Angstroms) |          |          |
|---------------|---------------|-------------|-------------------------|----------|----------|
|               |               |             | X                       | Y        | Z        |
| 1             | 6             | 0           | -6.58576                | -2.23913 | -0.21749 |
| 2             | 6             | 0           | -5.22579                | -2.55237 | -0.04242 |
| 3             | 6             | 0           | -4.27982                | -1.50782 | 0.094572 |
| 4             | 6             | 0           | -4.74015                | -0.17343 | 0.055855 |
| 5             | 6             | 0           | -6.09174                | 0.123201 | -0.10331 |
| 6             | 6             | 0           | -7.0112                 | -0.91966 | -0.24676 |
| 7             | 6             | 0           | -2.84886                | -1.74223 | 0.311116 |
| 8             | 6             | 0           | -3.78984                | 0.955263 | 0.189873 |
| 9             | 6             | 0           | -2.33905                | 0.722268 | 0.002378 |
| 10            | 6             | 0           | -1.90314                | -0.59576 | 0.252618 |
| 11            | 6             | 0           | -0.51205                | -0.85235 | 0.450178 |
| 12            | 6             | 0           | 0.427728                | 0.17939  | 0.405567 |
| 13            | 6             | 0           | 0.024236                | 1.477156 | -0.02324 |

Table S3. Cont.

| Center Number | Atomic Number | Atomic Type | Coordinates (Angstroms) |          |          |
|---------------|---------------|-------------|-------------------------|----------|----------|
|               |               |             | X                       | Y        | Z        |
| 14            | 6             | 0           | -1.38345                | 1.768705 | -0.23713 |
| 15            | 6             | 0           | -1.68947                | 3.075246 | -0.77638 |
| 16            | 6             | 0           | -0.69239                | 3.996618 | -1.02366 |
| 17            | 6             | 0           | 0.668964                | 3.718414 | -0.77774 |
| 18            | 6             | 0           | 1.004104                | 2.478981 | -0.28136 |
| 19            | 6             | 0           | 1.71302                 | 4.764551 | -1.06972 |
| 20            | 8             | 0           | -4.82076                | -3.84107 | -0.00994 |
| 21            | 8             | 0           | -0.05662                | -2.09646 | 0.709259 |
| 22            | 8             | 0           | -4.24635                | 2.069983 | 0.50507  |
| 23            | 8             | 0           | -2.41961                | -2.89666 | 0.519324 |
| 24            | 6             | 0           | 2.692389                | -0.57965 | -0.50735 |
| 25            | 6             | 0           | 1.860674                | -0.21723 | 0.737271 |
| 26            | 6             | 0           | 4.116116                | -0.96863 | -0.08376 |
| 27            | 6             | 0           | 4.728307                | 0.115567 | 0.820584 |
| 28            | 6             | 0           | 3.790364                | 0.413961 | 2.001742 |
| 29            | 8             | 0           | 2.504198                | 0.811132 | 1.504147 |
| 30            | 6             | 0           | 4.289067                | 1.536586 | 2.897182 |
| 31            | 8             | 0           | 5.977485                | -0.3077  | 1.362452 |
| 32            | 7             | 0           | 4.966122                | -1.22137 | -1.24279 |
| 33            | 6             | 0           | 5.616503                | -2.38936 | -1.4755  |
| 34            | 8             | 0           | 5.586704                | -3.34562 | -0.68646 |
| 35            | 6             | 0           | 6.390619                | -2.46491 | -2.77439 |
| 36            | 8             | 0           | -2.93464                | 3.457681 | -1.17896 |
| 37            | 1             | 0           | -7.29863                | -3.05292 | -0.3242  |
| 38            | 1             | 0           | -6.41542                | 1.15708  | -0.12585 |
| 39            | 1             | 0           | -8.06583                | -0.69909 | -0.38281 |
| 40            | 1             | 0           | -0.99096                | 4.956632 | -1.43617 |
| 41            | 1             | 0           | 2.04132                 | 2.251979 | -0.08619 |
| 42            | 1             | 0           | 1.520871                | 5.682519 | -0.49946 |
| 43            | 1             | 0           | 2.717322                | 4.411127 | -0.81706 |
| 44            | 1             | 0           | 1.705114                | 5.043858 | -2.13126 |
| 45            | 1             | 0           | -5.59062                | -4.42412 | -0.14314 |
| 46            | 1             | 0           | -0.85518                | -2.69767 | 0.712807 |
| 47            | 1             | 0           | 2.722391                | 0.270943 | -1.1987  |
| 48            | 1             | 0           | 1.808763                | -1.11037 | 1.370678 |
| 49            | 1             | 0           | 4.090491                | -1.90175 | 0.486687 |
| 50            | 1             | 0           | 4.858397                | 1.041254 | 0.237173 |
| 51            | 1             | 0           | 3.677078                | -0.51135 | 2.589953 |
| 52            | 1             | 0           | 2.219512                | -1.41776 | -1.03058 |
| 53            | 1             | 0           | 3.577903                | 1.714537 | 3.711067 |
| 54            | 1             | 0           | 5.256375                | 1.273315 | 3.334766 |
| 55            | 1             | 0           | 4.404831                | 2.465867 | 2.326833 |
| 56            | 1             | 0           | 6.56145                 | -0.51664 | 0.613089 |
| 57            | 1             | 0           | 6.353254                | -1.53951 | -3.35525 |
| 58            | 1             | 0           | 7.435235                | -2.70826 | -2.55295 |
| 59            | 1             | 0           | 5.984073                | -3.28311 | -3.37934 |
| 60            | 1             | 0           | 5.015243                | -0.49768 | -1.95105 |
| 61            | 1             | 0           | -3.59531                | 3.090039 | -0.54117 |



**Table S4.** Optimized Z-Matrixes of Conformer 1 of (6'S, 16'R, 17'R)-2. Standard orientation.

| Center Number | Atomic Number | Atomic Type | Coordinates (Angstroms) |          |          |
|---------------|---------------|-------------|-------------------------|----------|----------|
|               |               |             | X                       | Y        | Z        |
| 1             | 6             | 0           | 5.715434                | -2.26822 | -0.43924 |
| 2             | 6             | 0           | 4.907718                | -1.12172 | -0.32309 |
| 3             | 6             | 0           | 3.495798                | -1.25714 | -0.24673 |
| 4             | 6             | 0           | 2.941269                | -2.55743 | -0.27372 |
| 5             | 6             | 0           | 3.752335                | -3.68344 | -0.38148 |
| 6             | 6             | 0           | 5.141711                | -3.52954 | -0.4691  |
| 7             | 6             | 0           | 2.640604                | -0.07112 | -0.13037 |
| 8             | 6             | 0           | 1.479828                | -2.72632 | -0.17092 |
| 9             | 6             | 0           | 0.615796                | -1.54209 | -0.11636 |
| 10            | 6             | 0           | 1.158195                | -0.22385 | -0.14482 |
| 11            | 6             | 0           | 0.281076                | 0.882229 | -0.19481 |
| 12            | 6             | 0           | -1.11021                | 0.646101 | -0.21102 |
| 13            | 6             | 0           | -1.67063                | -0.62528 | -0.03838 |
| 14            | 6             | 0           | -0.78923                | -1.7372  | -0.05084 |
| 15            | 6             | 0           | -3.14315                | -0.76589 | 0.092731 |
| 16            | 6             | 0           | -2.04477                | 1.817436 | -0.458   |
| 17            | 6             | 0           | -3.29621                | 1.381253 | -1.21226 |
| 18            | 6             | 0           | -3.94768                | 0.224891 | -0.50216 |
| 19            | 6             | 0           | -3.74617                | -1.80542 | 0.826174 |
| 20            | 6             | 0           | -5.34207                | 0.114805 | -0.40165 |
| 21            | 6             | 0           | -5.13518                | -1.89043 | 0.94864  |
| 22            | 6             | 0           | -5.93157                | -0.92655 | 0.317593 |
| 23            | 8             | 0           | -6.09359                | 1.075216 | -1.03093 |
| 24            | 8             | 0           | -1.3229                 | -2.96388 | -0.04223 |
| 25            | 8             | 0           | 5.528483                | 0.070101 | -0.30513 |
| 26            | 8             | 0           | 3.175277                | 1.052955 | -0.02305 |
| 27            | 6             | 0           | 0.765313                | 2.32821  | -0.16955 |
| 28            | 6             | 0           | -0.30355                | 3.387558 | -0.5613  |
| 29            | 8             | 0           | 1.167581                | 2.579442 | 1.217536 |
| 30            | 6             | 0           | 2.253035                | 3.341509 | 1.453634 |
| 31            | 6             | 0           | 2.611676                | 3.334517 | 2.915187 |
| 32            | 8             | 0           | 2.859282                | 3.9532   | 0.591719 |
| 33            | 8             | 0           | -1.38358                | 2.78215  | -1.26389 |
| 34            | 6             | 0           | 0.24281                 | 4.482099 | -1.46527 |
| 35            | 8             | 0           | 1.000038                | -3.88376 | -0.15981 |
| 36            | 6             | 0           | -5.77549                | -3.0129  | 1.730495 |
| 37            | 1             | 0           | 6.790955                | -2.13312 | -0.50554 |
| 38            | 1             | 0           | 3.302318                | -4.66933 | -0.39649 |
| 39            | 1             | 0           | 5.776606                | -4.40639 | -0.55875 |
| 40            | 1             | 0           | -3.00473                | 1.103875 | -2.23643 |
| 41            | 1             | 0           | -3.13125                | -2.54733 | 1.319522 |
| 42            | 1             | 0           | -7.01691                | -0.97613 | 0.390084 |
| 43            | 1             | 0           | -7.0365                 | 0.910262 | -0.85759 |
| 44            | 1             | 0           | -0.56319                | -3.61983 | -0.09372 |
| 45            | 1             | 0           | 4.815587                | 0.760657 | -0.21666 |
| 46            | 1             | 0           | 1.748047                | 3.624039 | 3.523736 |
| 47            | 1             | 0           | 2.90227                 | 2.320316 | 3.212403 |
| 48            | 1             | 0           | 3.44249                 | 4.019933 | 3.093852 |

Table S4. Cont.

| Center Number | Atomic Number | Atomic Type | Coordinates (Angstroms) |          |          |
|---------------|---------------|-------------|-------------------------|----------|----------|
|               |               |             | X                       | Y        | Z        |
| 49            | 1             | 0           | 1.647865                | 2.445419 | -0.79431 |
| 50            | 1             | 0           | -0.69079                | 3.824665 | 0.371479 |
| 51            | 1             | 0           | 0.641248                | 4.053682 | -2.39233 |
| 52            | 1             | 0           | -0.55699                | 5.184946 | -1.72352 |
| 53            | 1             | 0           | 1.044201                | 5.027378 | -0.96094 |
| 54            | 1             | 0           | -3.97812                | 2.231517 | -1.28916 |
| 55            | 1             | 0           | -2.33394                | 2.275675 | 0.503258 |
| 56            | 1             | 0           | -6.53505                | -2.6356  | 2.425838 |
| 57            | 1             | 0           | -6.2785                 | -3.72513 | 1.062556 |
| 58            | 1             | 0           | -5.03038                | -3.56936 | 2.308534 |

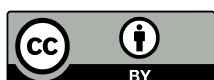

© 2016 by the authors; licensee MDPI, Basel, Switzerland. This article is an open access article distributed under the terms and conditions of the Creative Commons by Attribution (CC-BY) license (<http://creativecommons.org/licenses/by/4.0/>).
